# Supplementary material for: Transfer learning for landslide susceptibility modelling using domain adaptation and case-based reasoning
Source: Copernicus journal article supplement (doi:10.5194/gmd-2022-119), 2022-05-18
Supplement: Supplementary file 1 [file gmd-2022-119-supplement.pdf]

# Target area: Burgenland 1

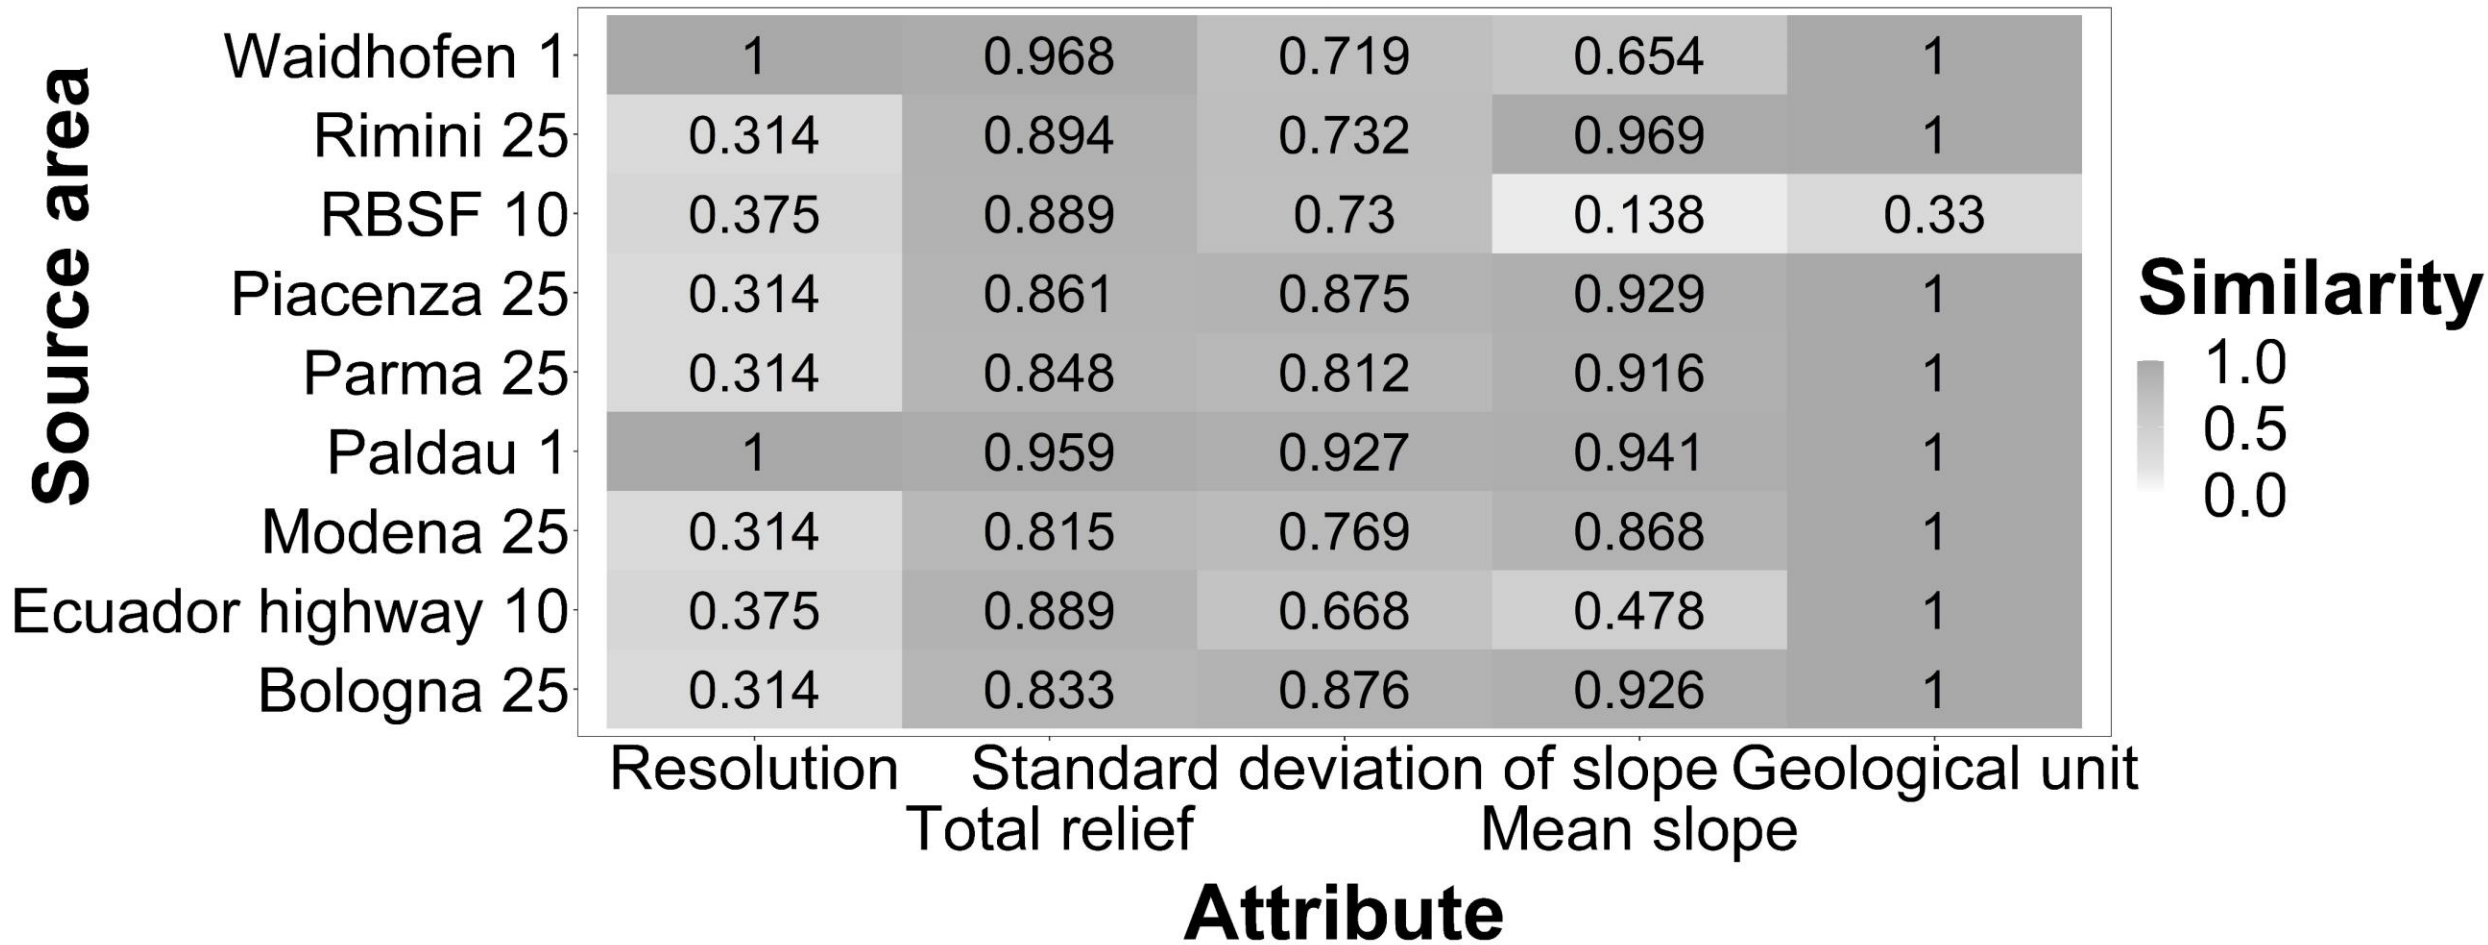

Figure S1: Similarity scores of different attributes for Burgenland with a 1 m x 1 m resolution. Light colours represent smaller similarities.

# Target area: Paldau 1

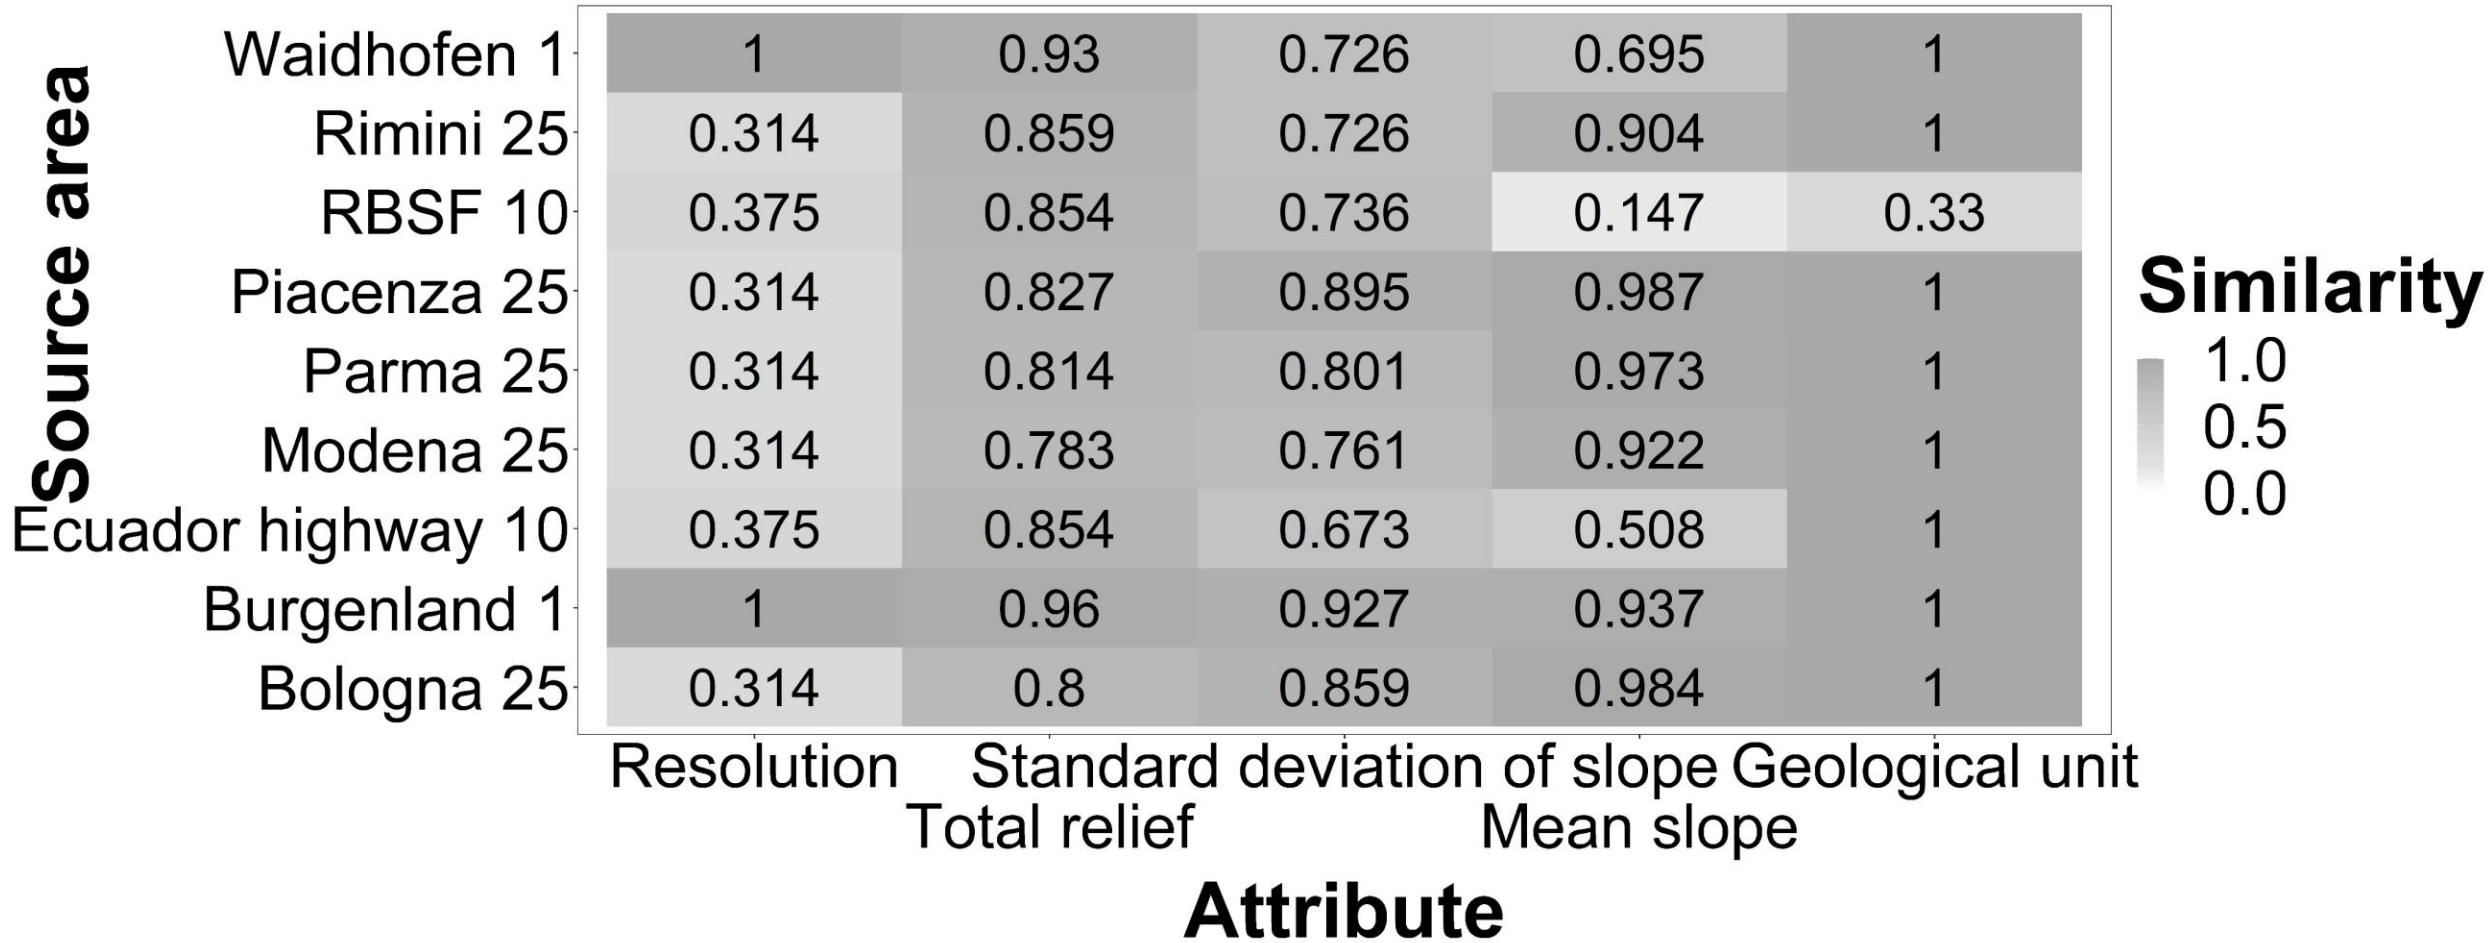

Figure S2: Similarity scores of different attributes for Paldau with a 1 m x 1 m resolution. Light colours represent smaller similarities.

## Target area: Waidhofen 1

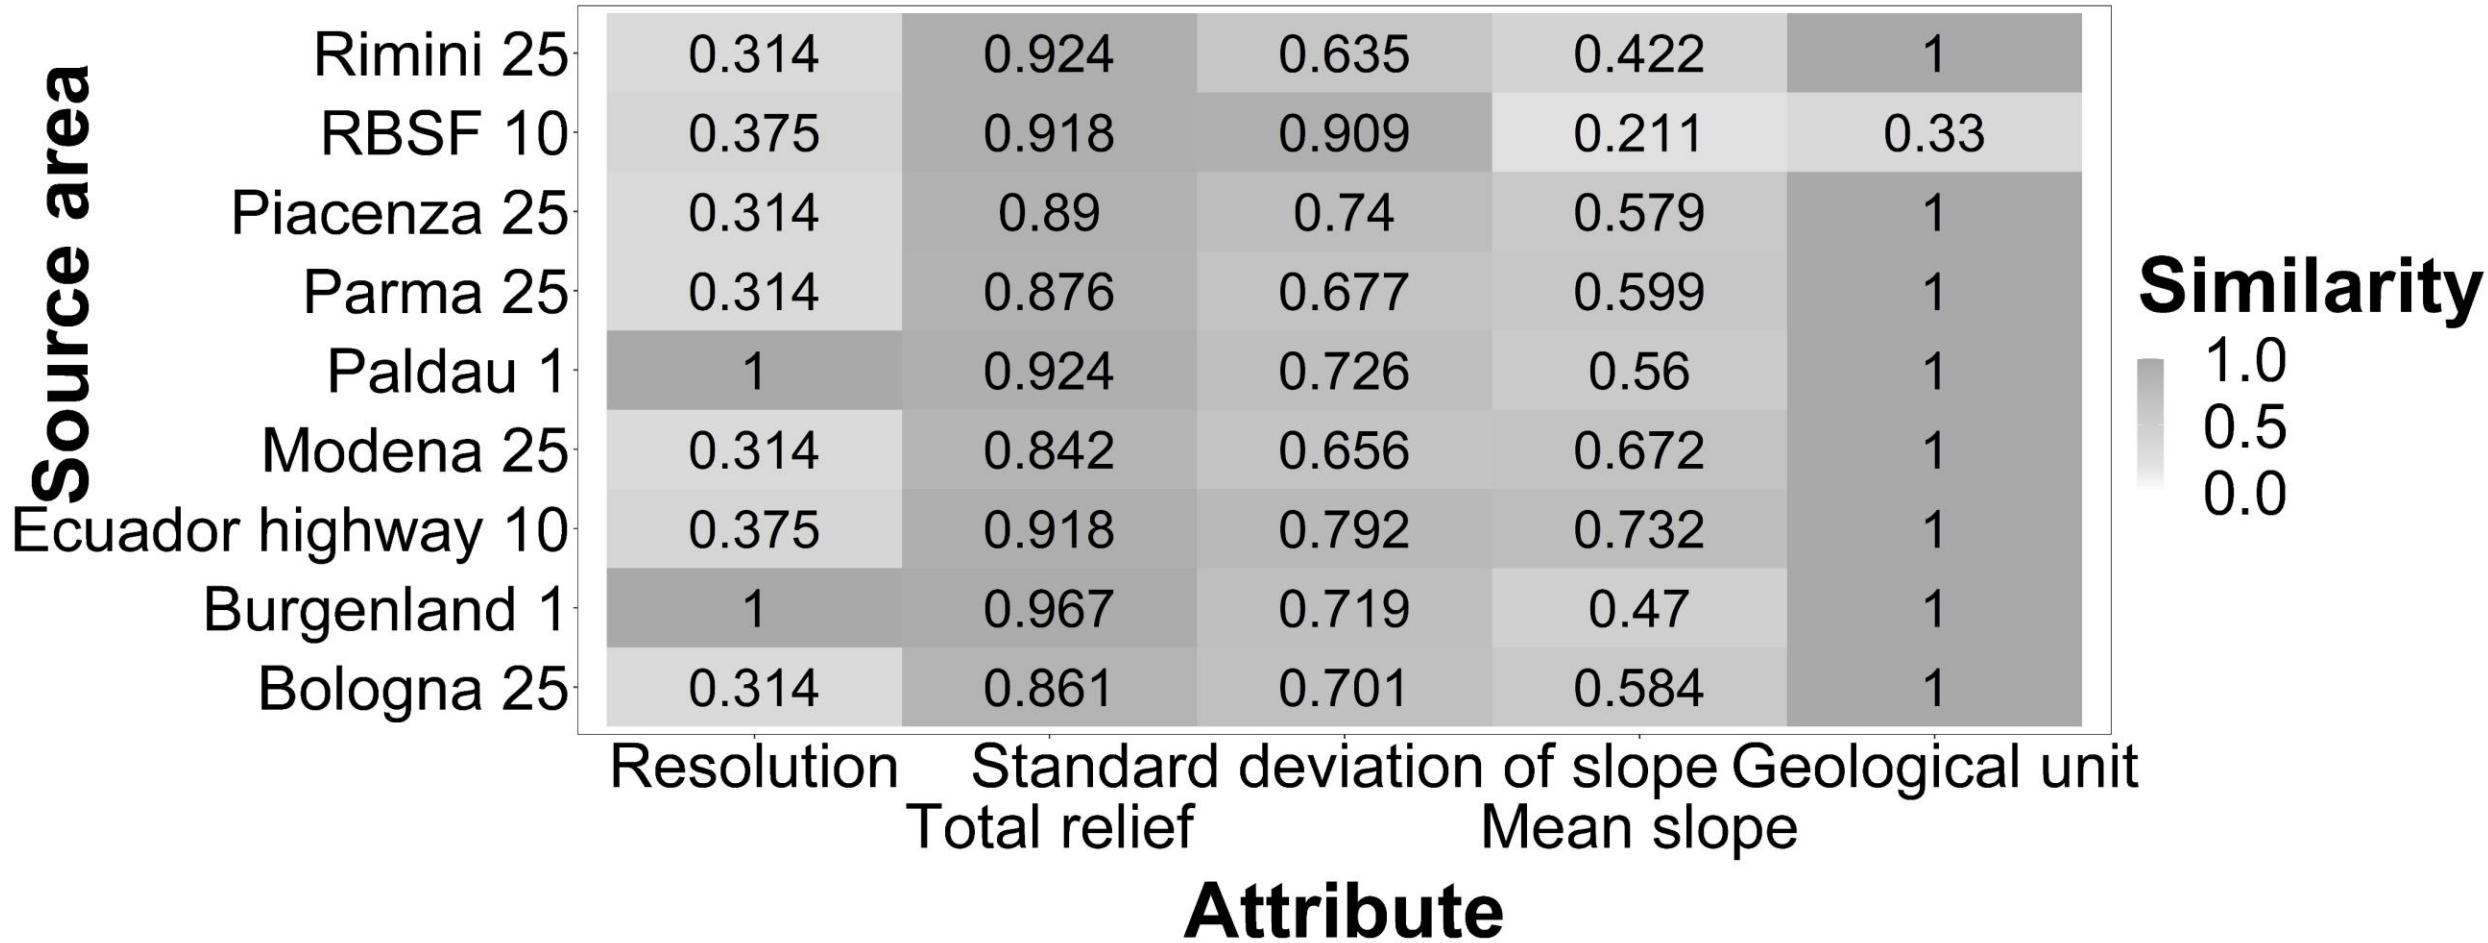

Figure S3: Similarity scores of different attributes for Waidhofen with a 1 m x 1 m resolution. Light colours represent smaller similarities.

## Target area: RBSF 10

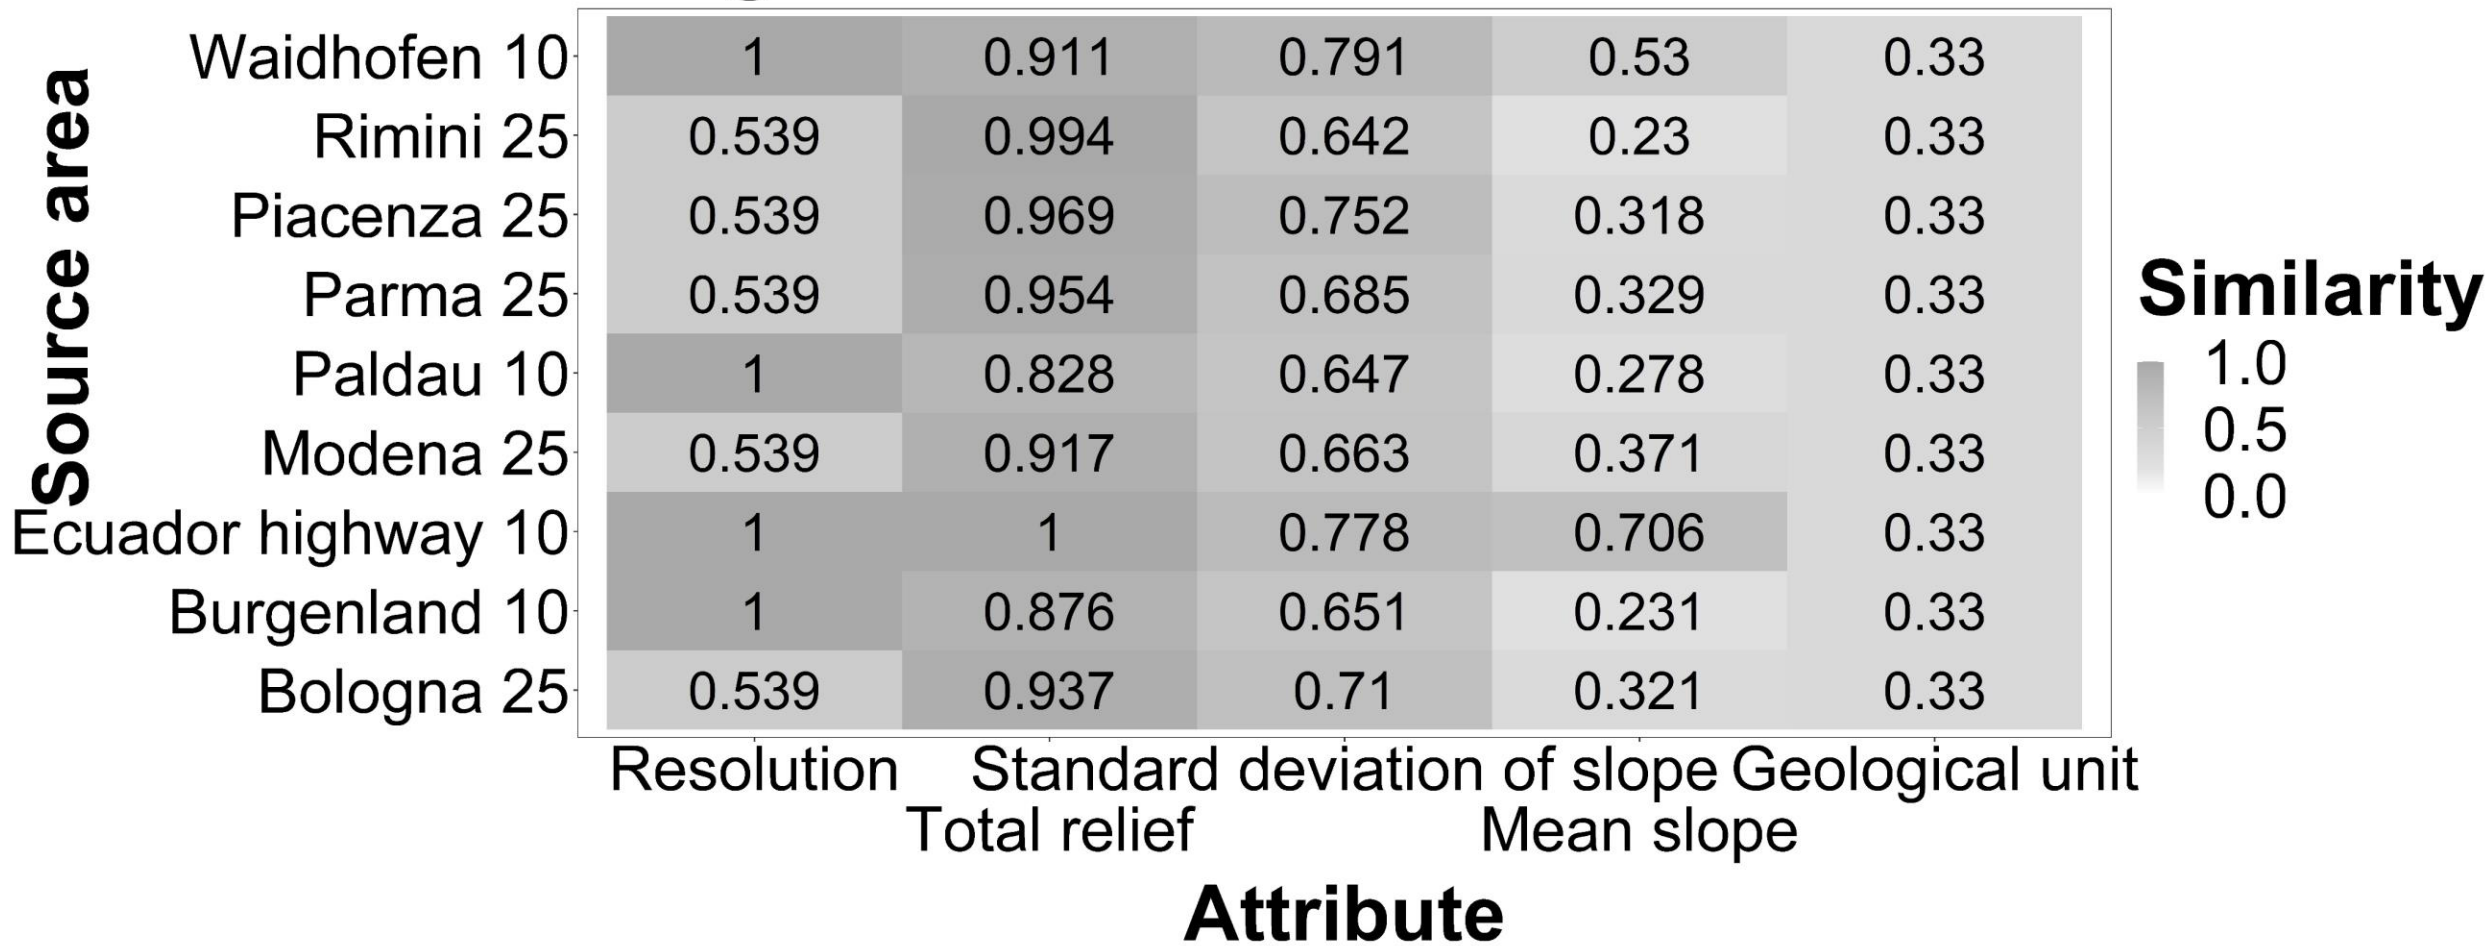

Figure S4: Similarity scores of different attributes for RBSF with a 10 m x 10 m resolution. Light colours represent smaller similarities.

## Target area: Ecuador highway 10

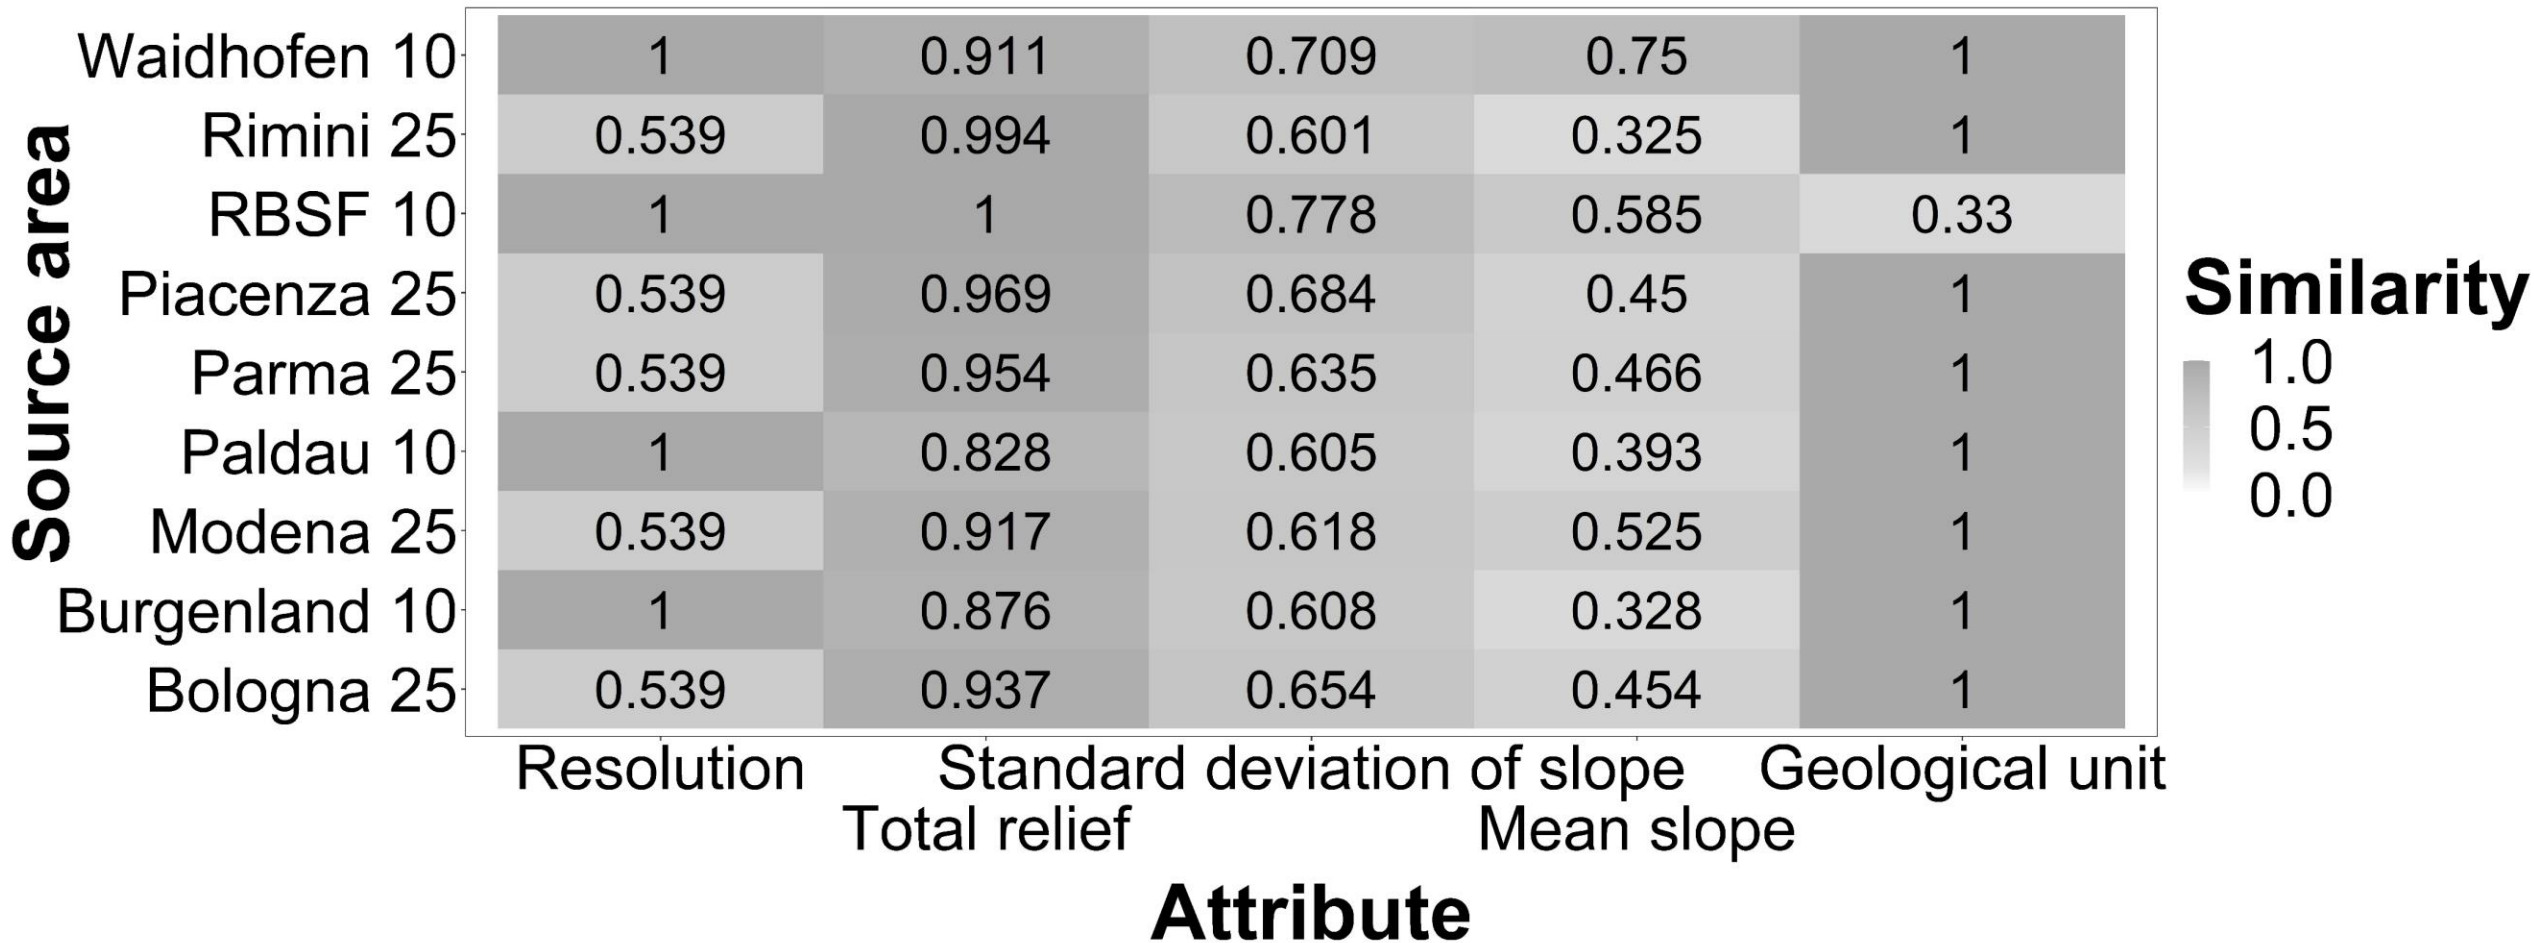

Figure S5: Similarity scores of different attributes for Ecuador highway with a 10 m x 10 m resolution. Light colours represent smaller similarities.



# Target area: Burgenland 10

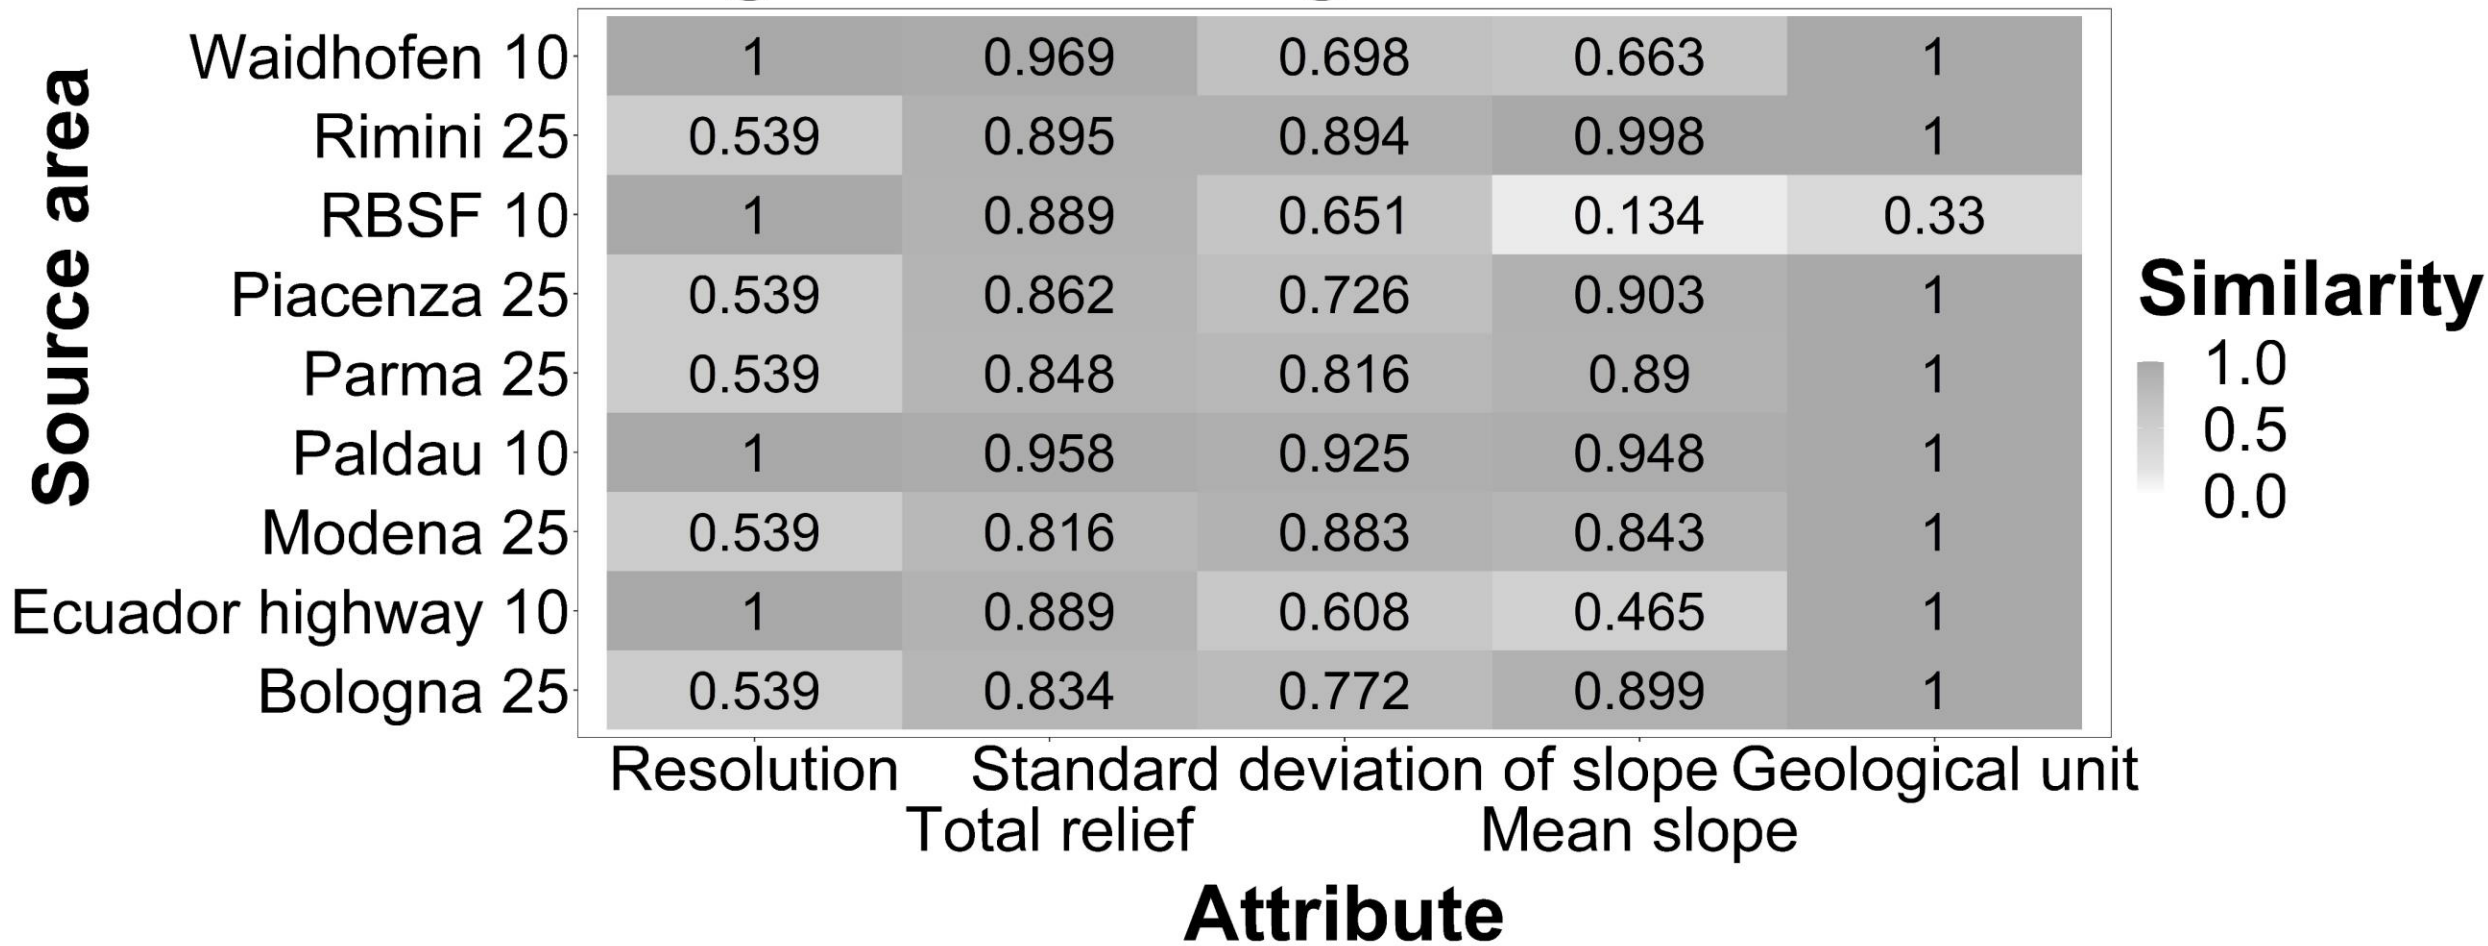

Figure S6: Similarity scores of different attributes for Burgenland with a 10 m x 10 m resolution. Light colours represent smaller similarities.

## Target area: Paldau 10

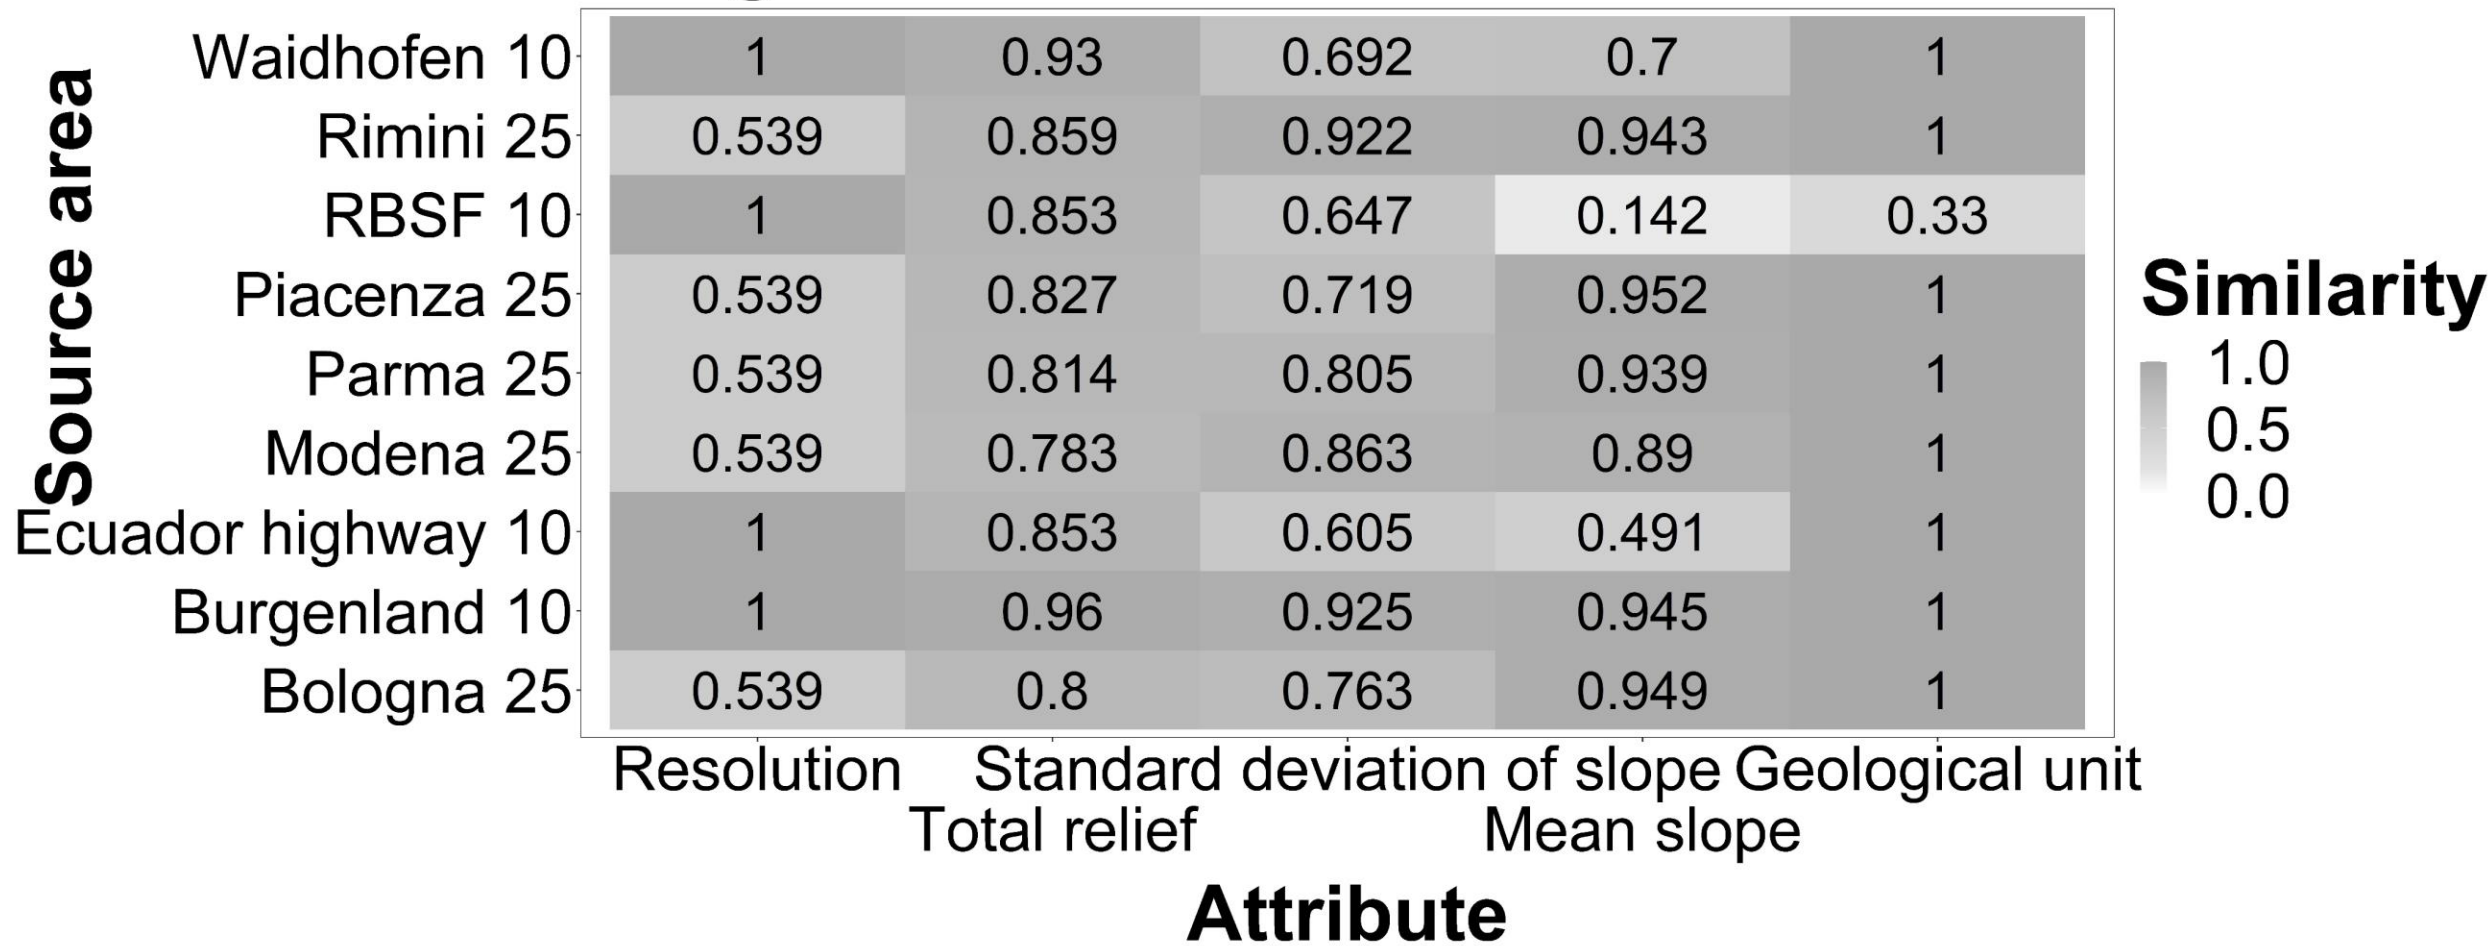

Figure S7: Similarity scores of different attributes for Paldau with a 10 m x 10 m resolution. Light colours represent smaller similarities.

## Target area: Waidhofen 10

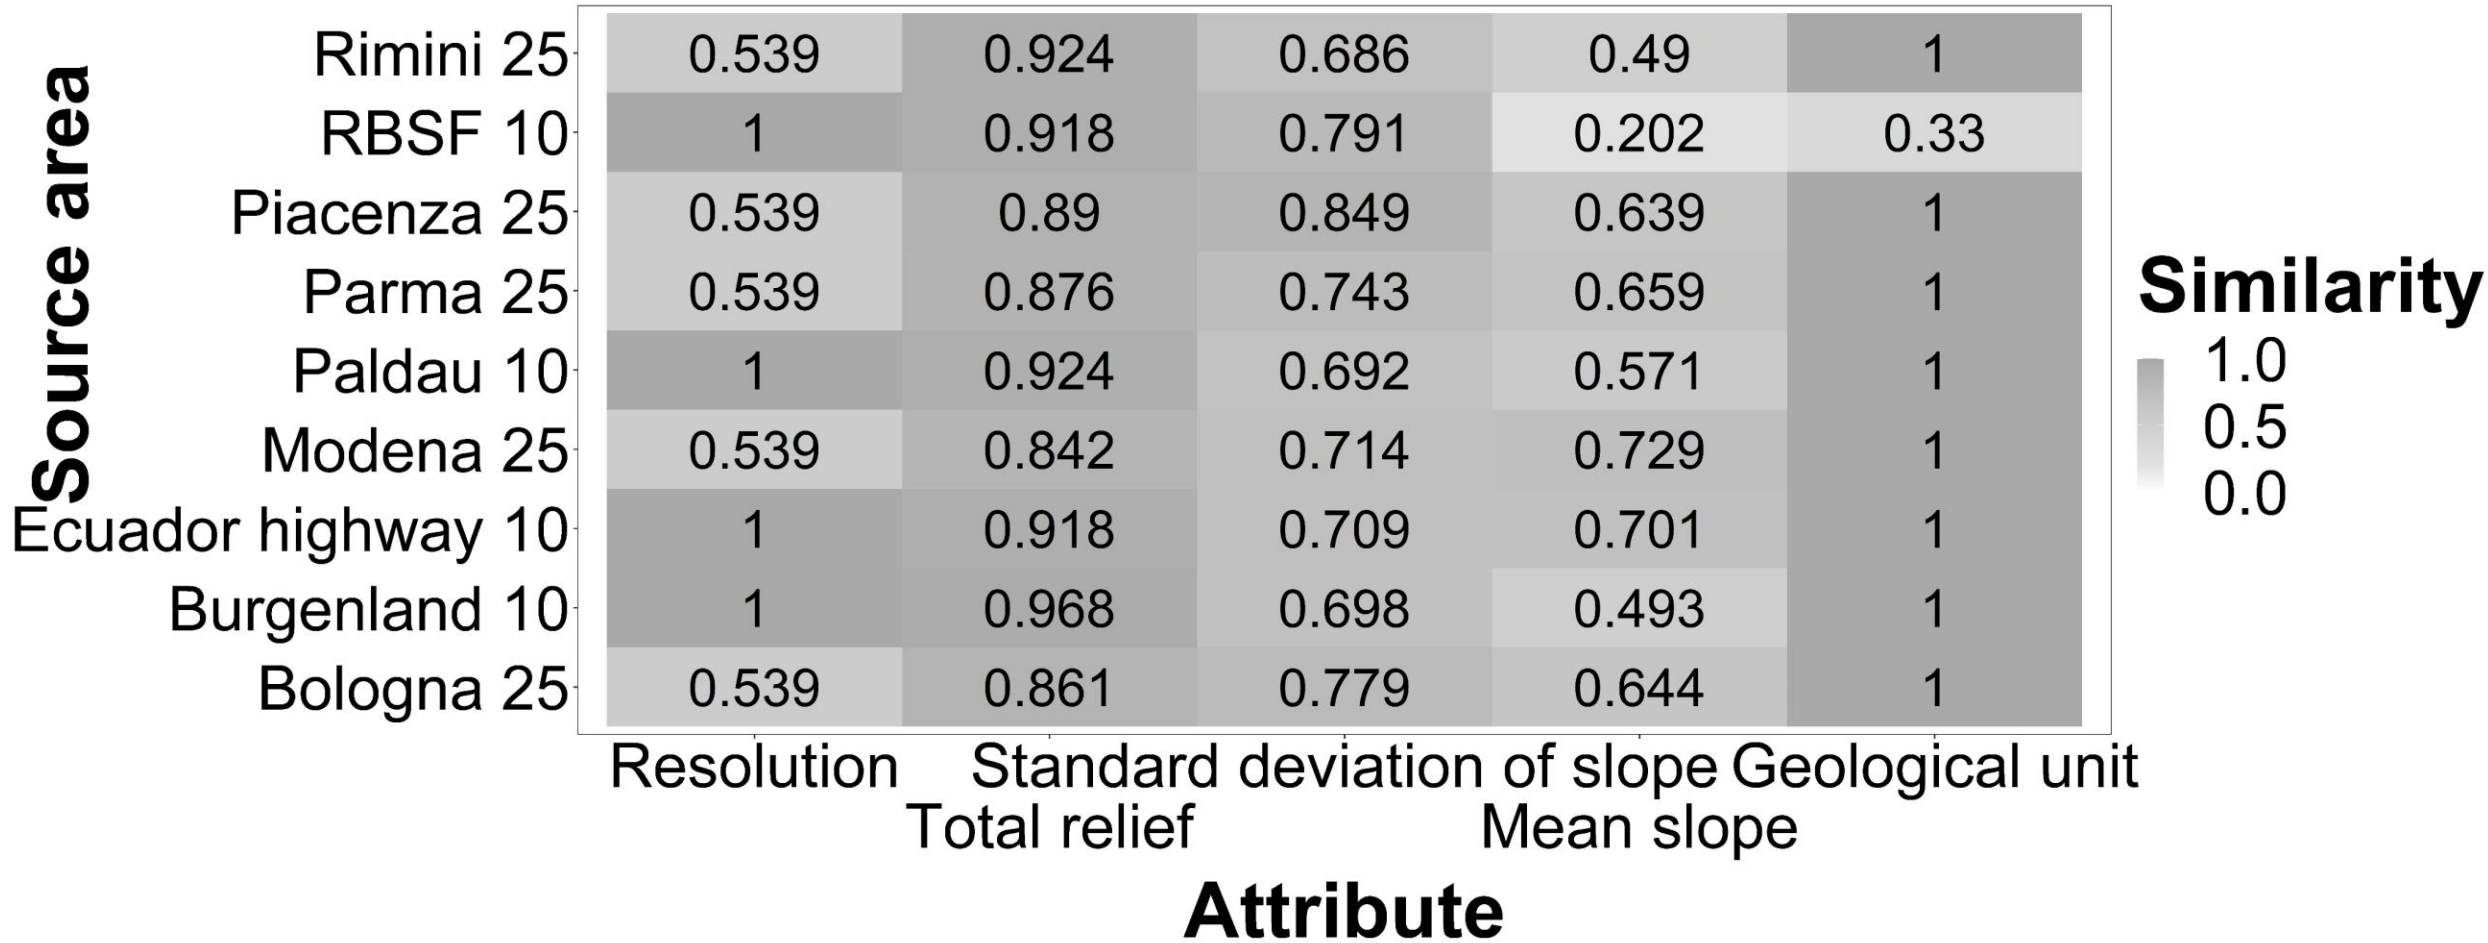

Figure S8: Similarity scores of different attributes for Waidhofen with a 10 m x 10 m resolution. Light colours represent smaller similarities.



# Target area: Bologna 25

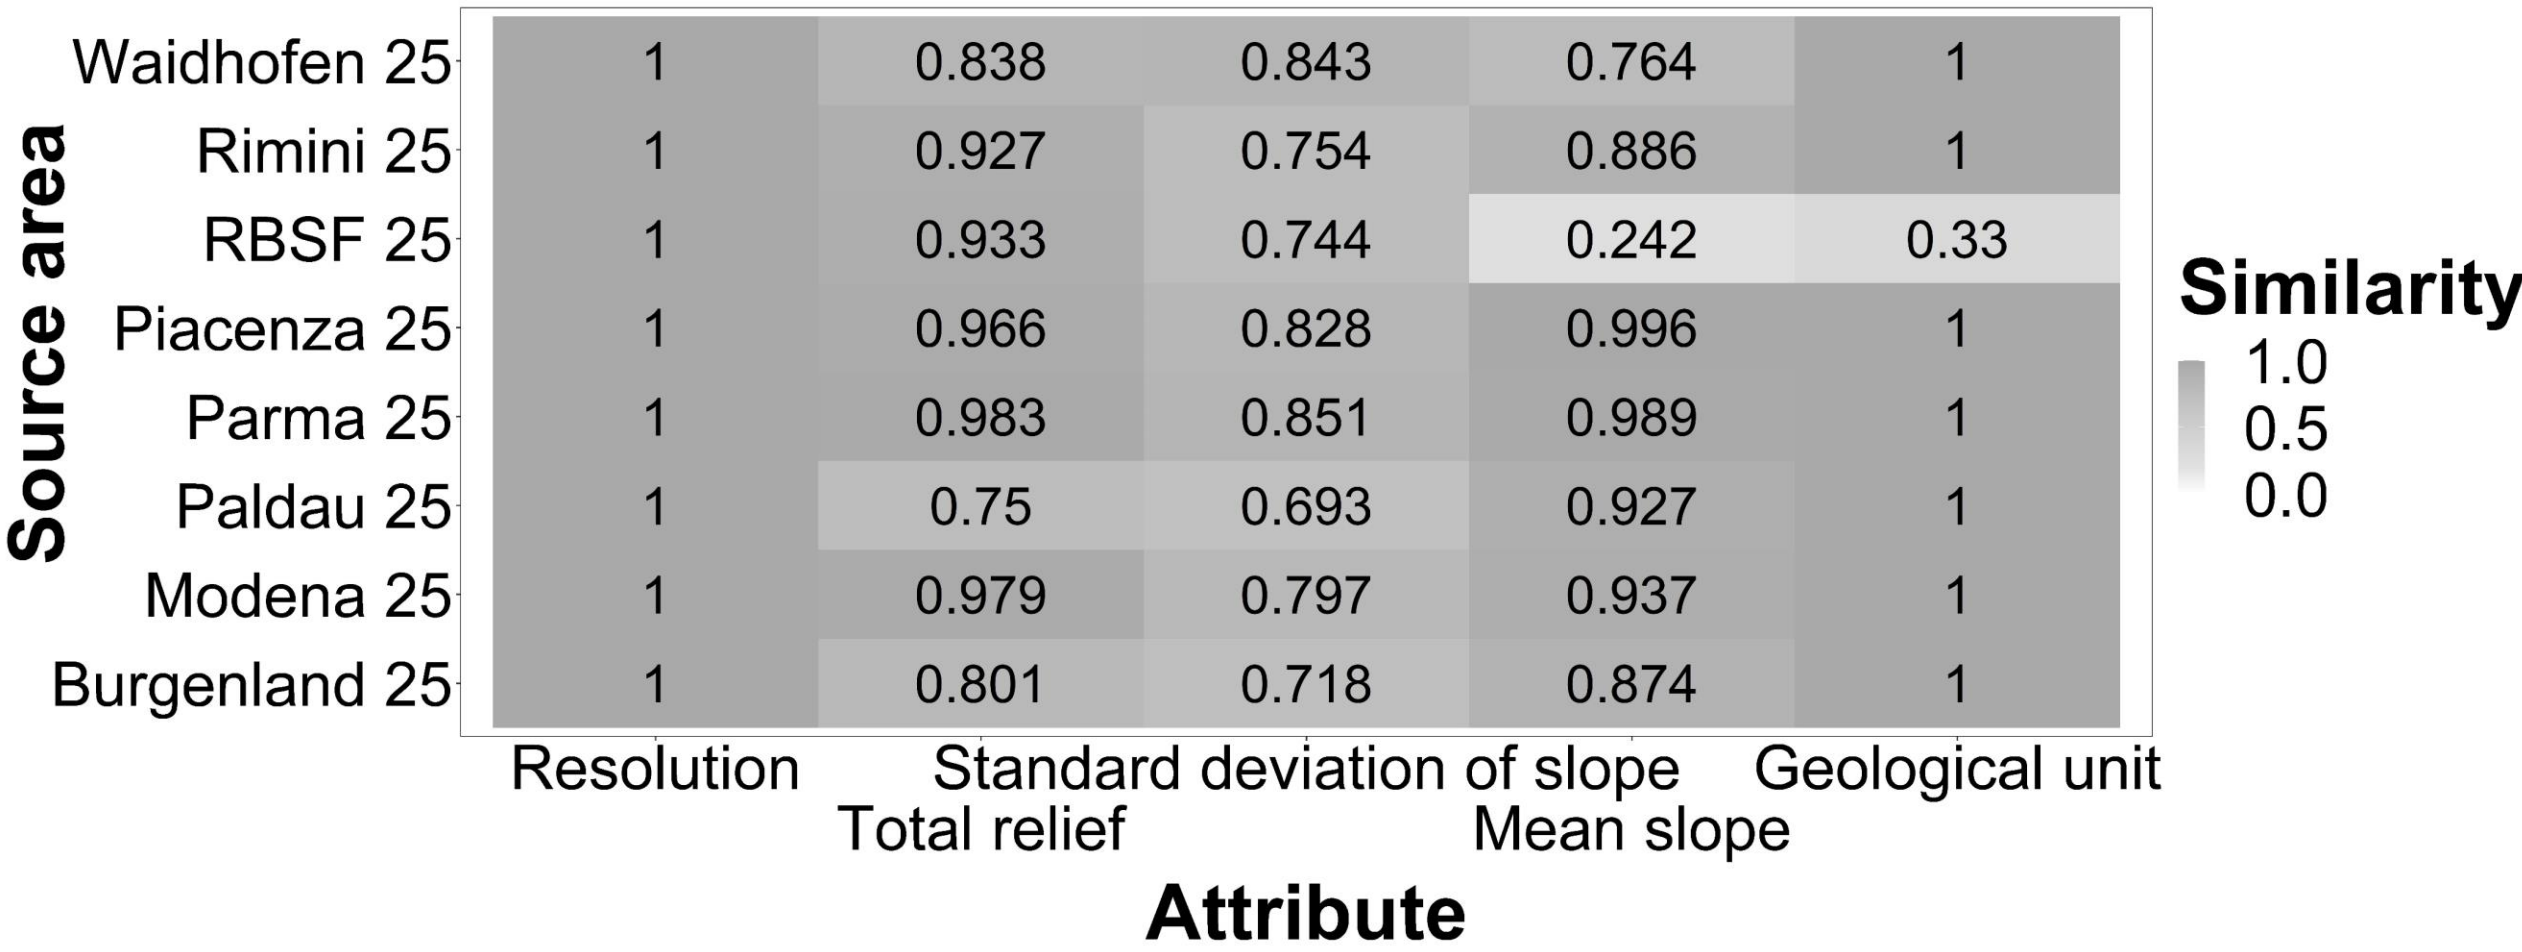

Figure S9: Similarity scores of different attributes for Bologna with a 25 m x 25 m resolution. Light colours represent smaller similarities.

## Target area: Modena 25

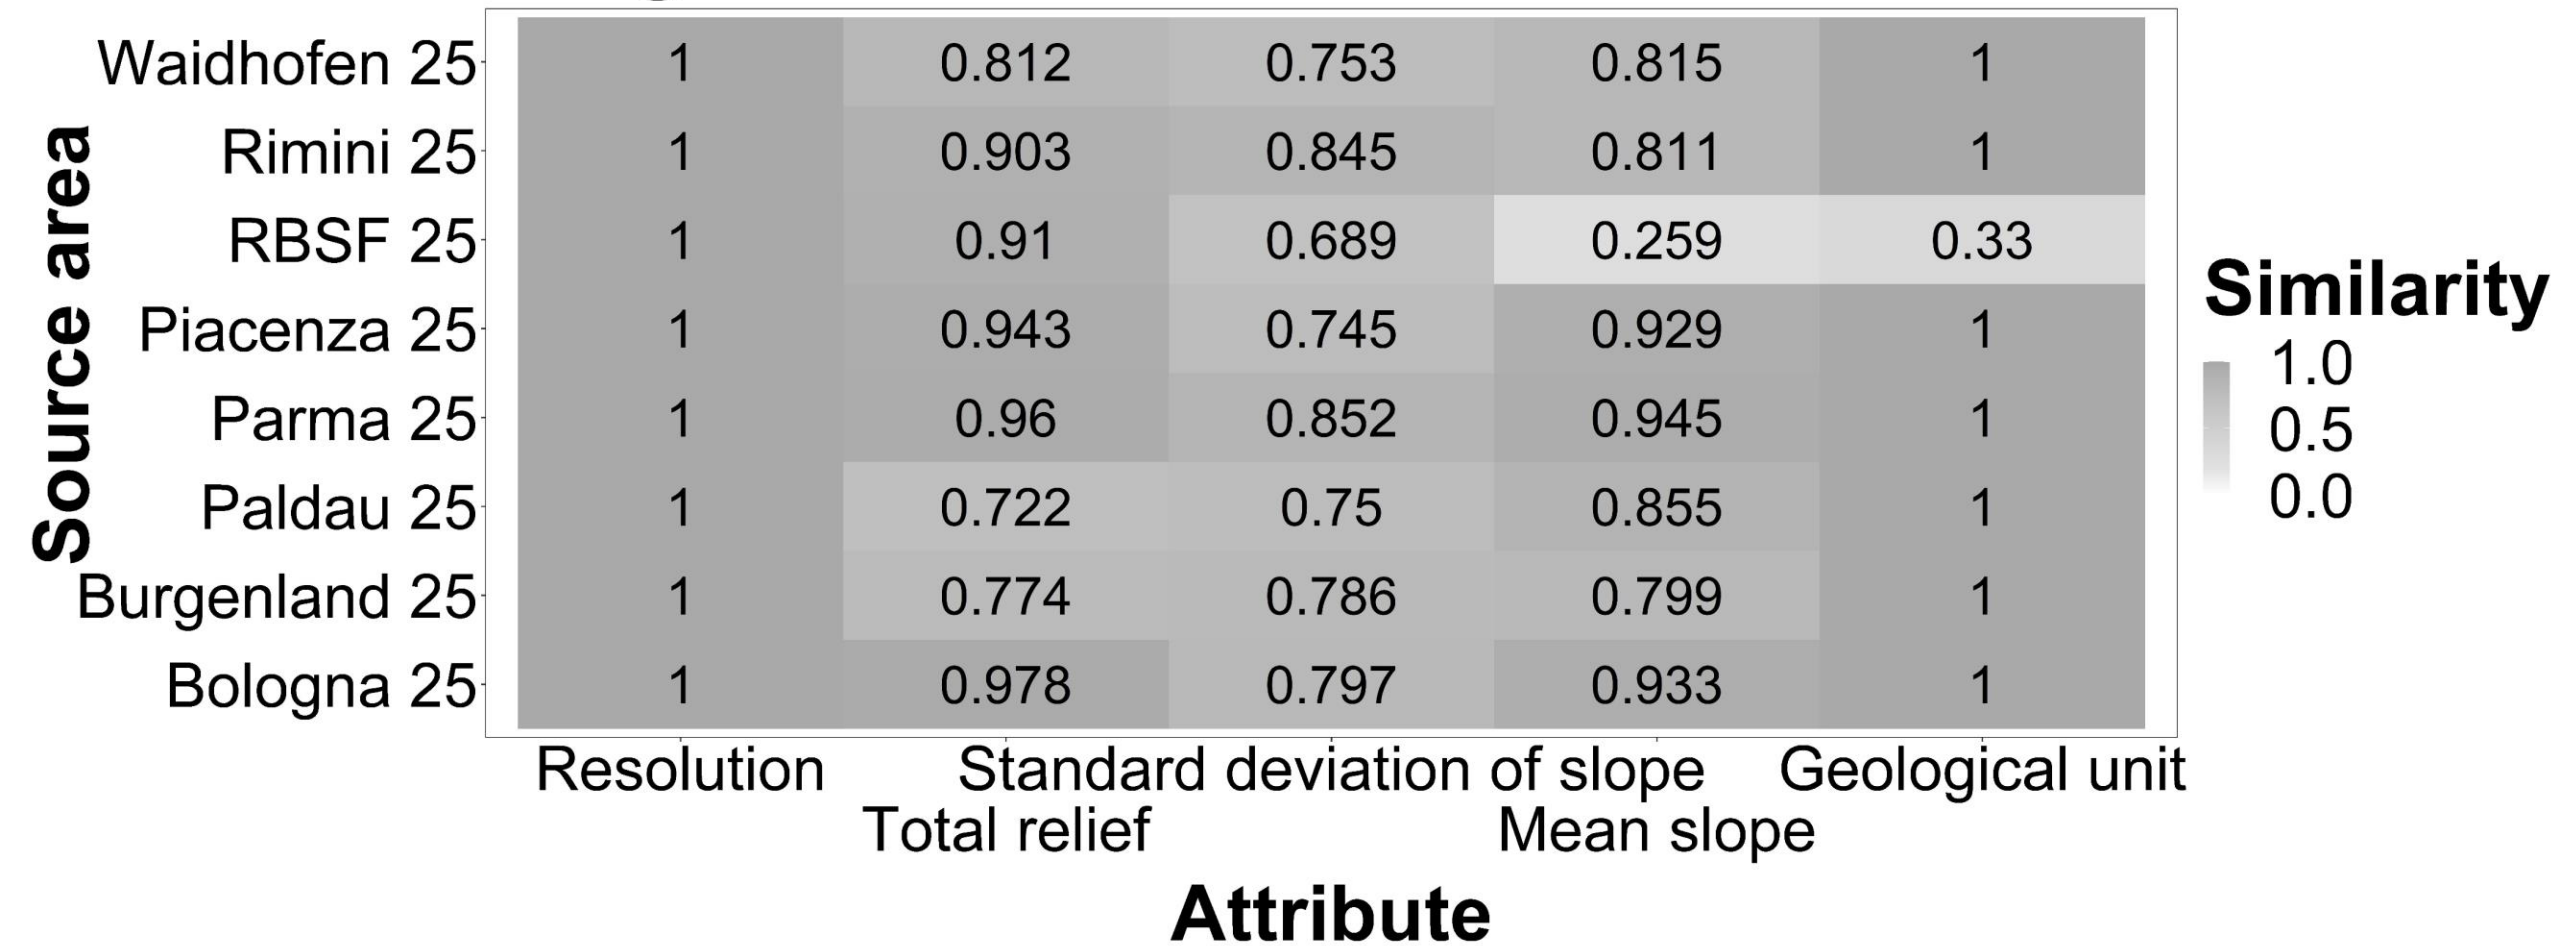

Figure S10: Similarity scores of different attributes for Modena with a 25 m x 25 m resolution. Light colours represent smaller similarities.

# Target area: Parma 25

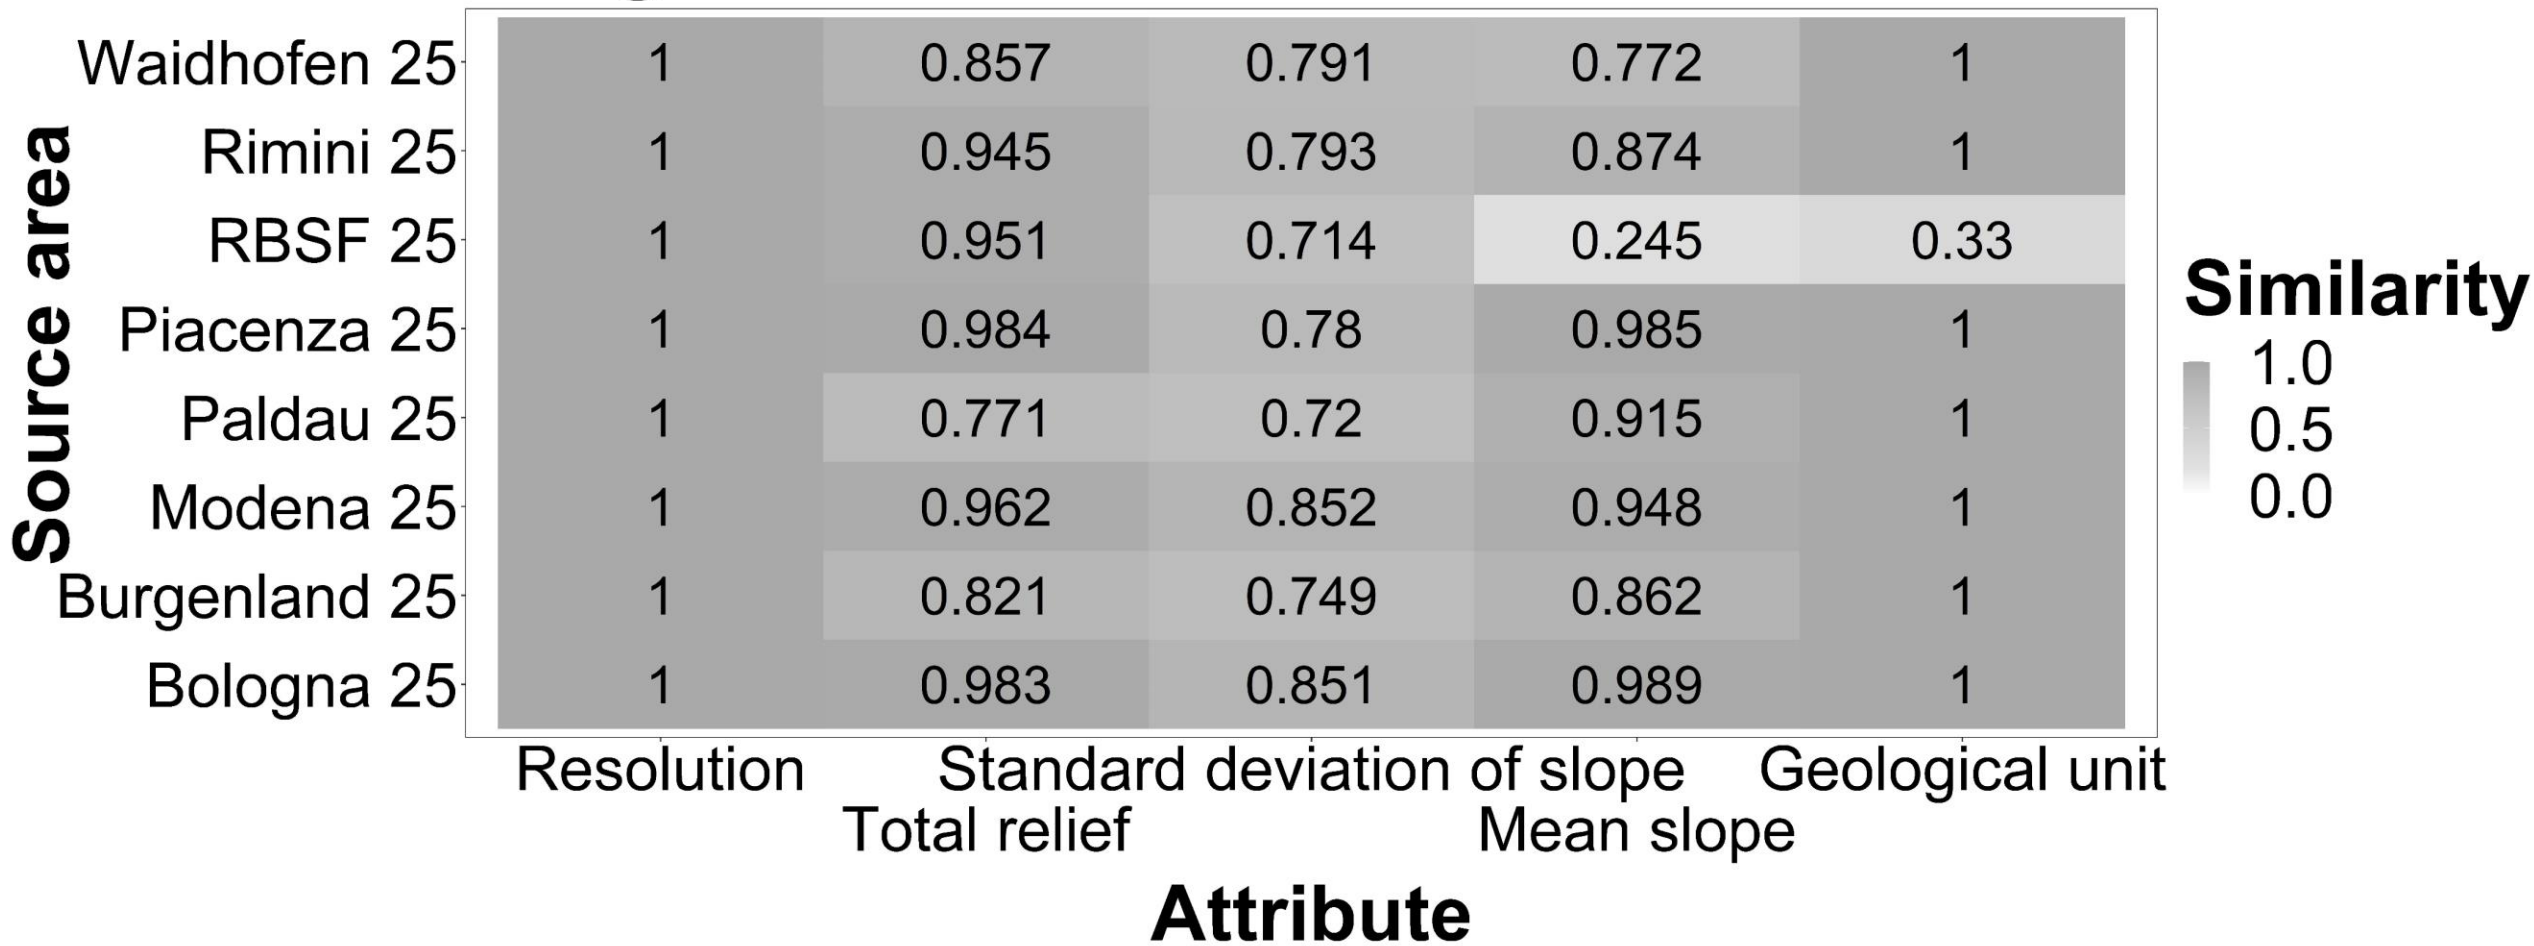

Figure S11: Similarity scores of different attributes for Parma with a 25 m x 25 m resolution. Light colours represent smaller similarities.

## Target area: Piacenza 25

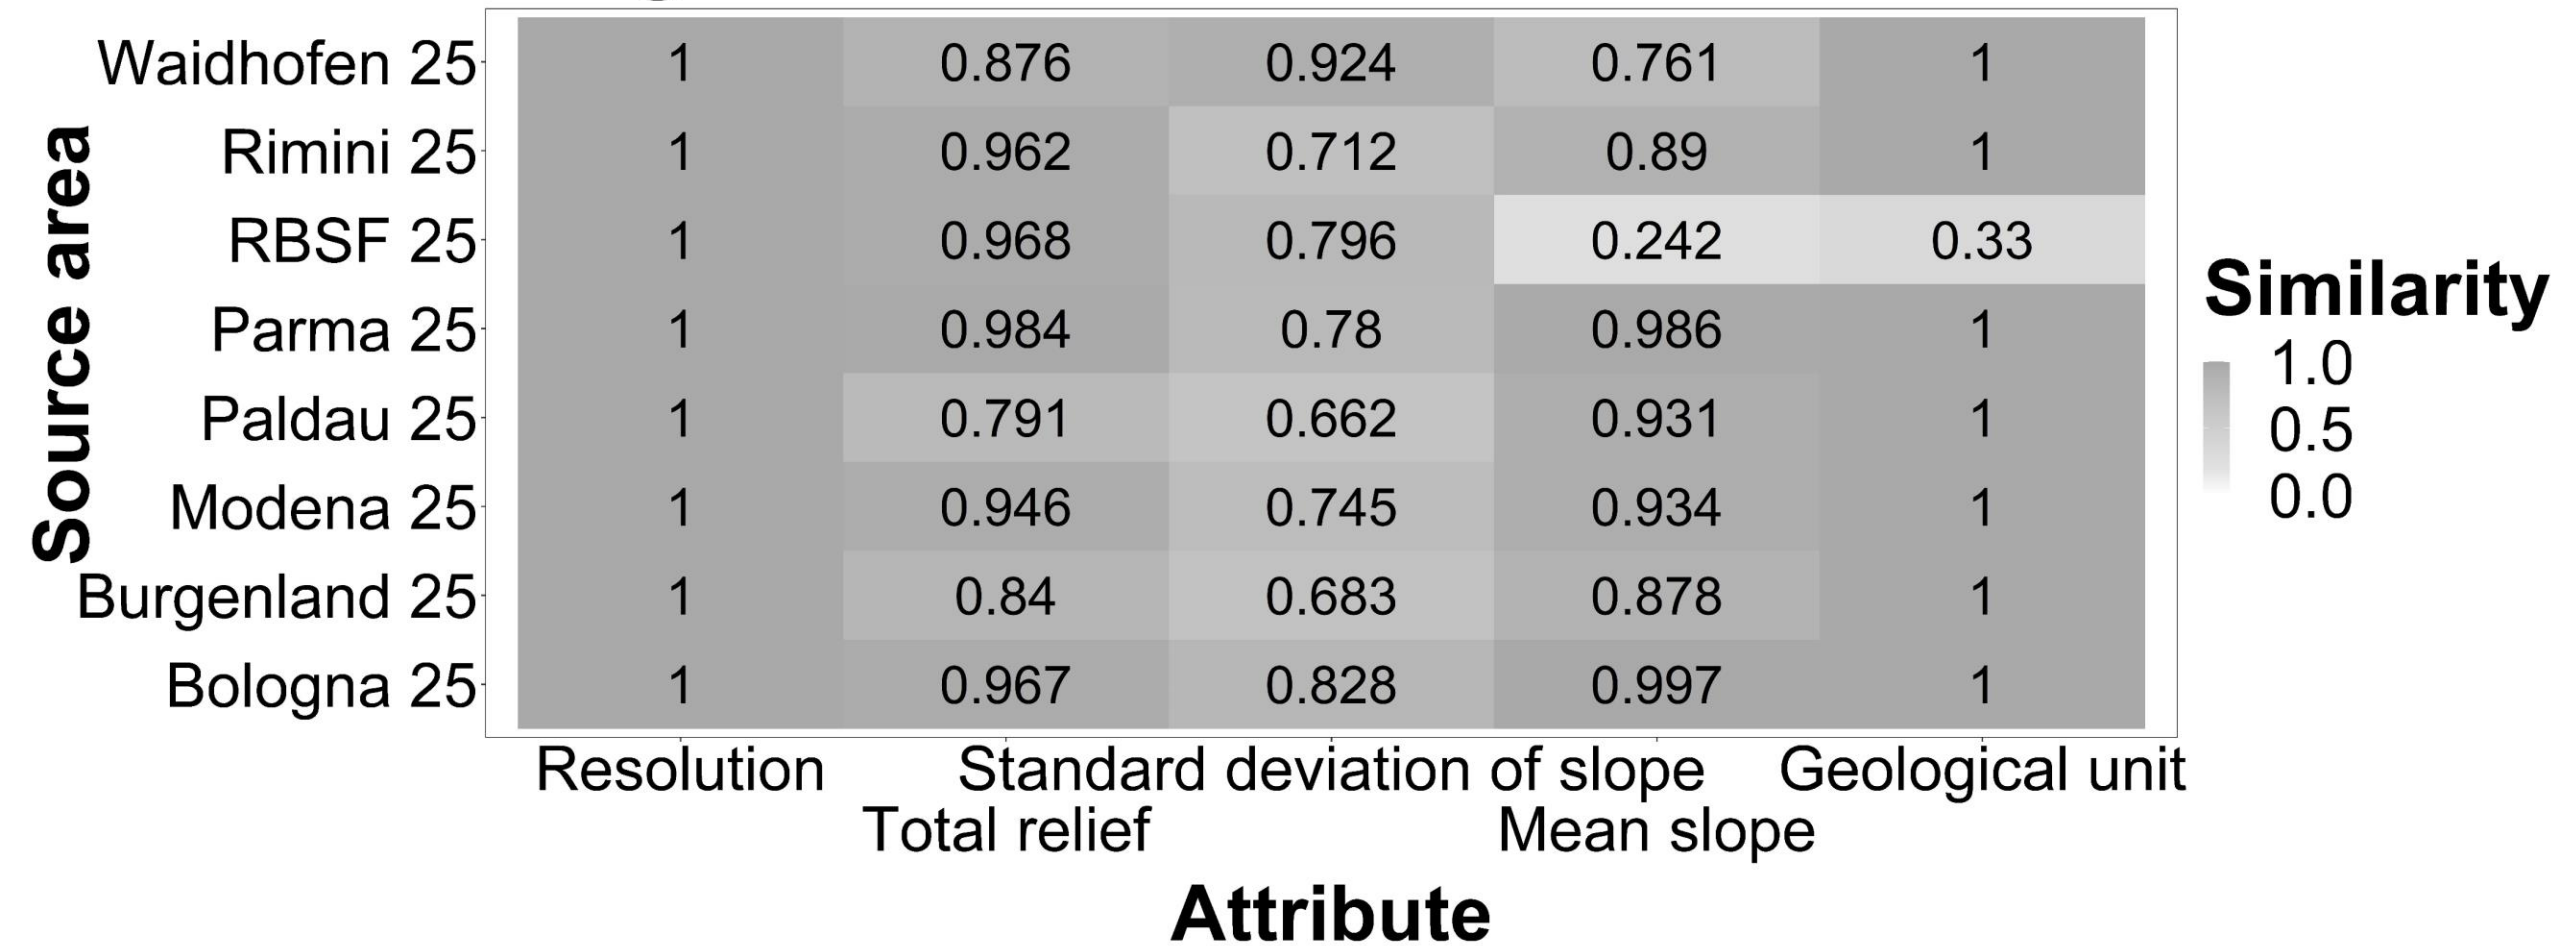

Figure S12: Similarity scores of different attributes for Piacenza with a 25 m x 25 m resolution. Light colours represent smaller similarities.

## Target area: Rimini 25

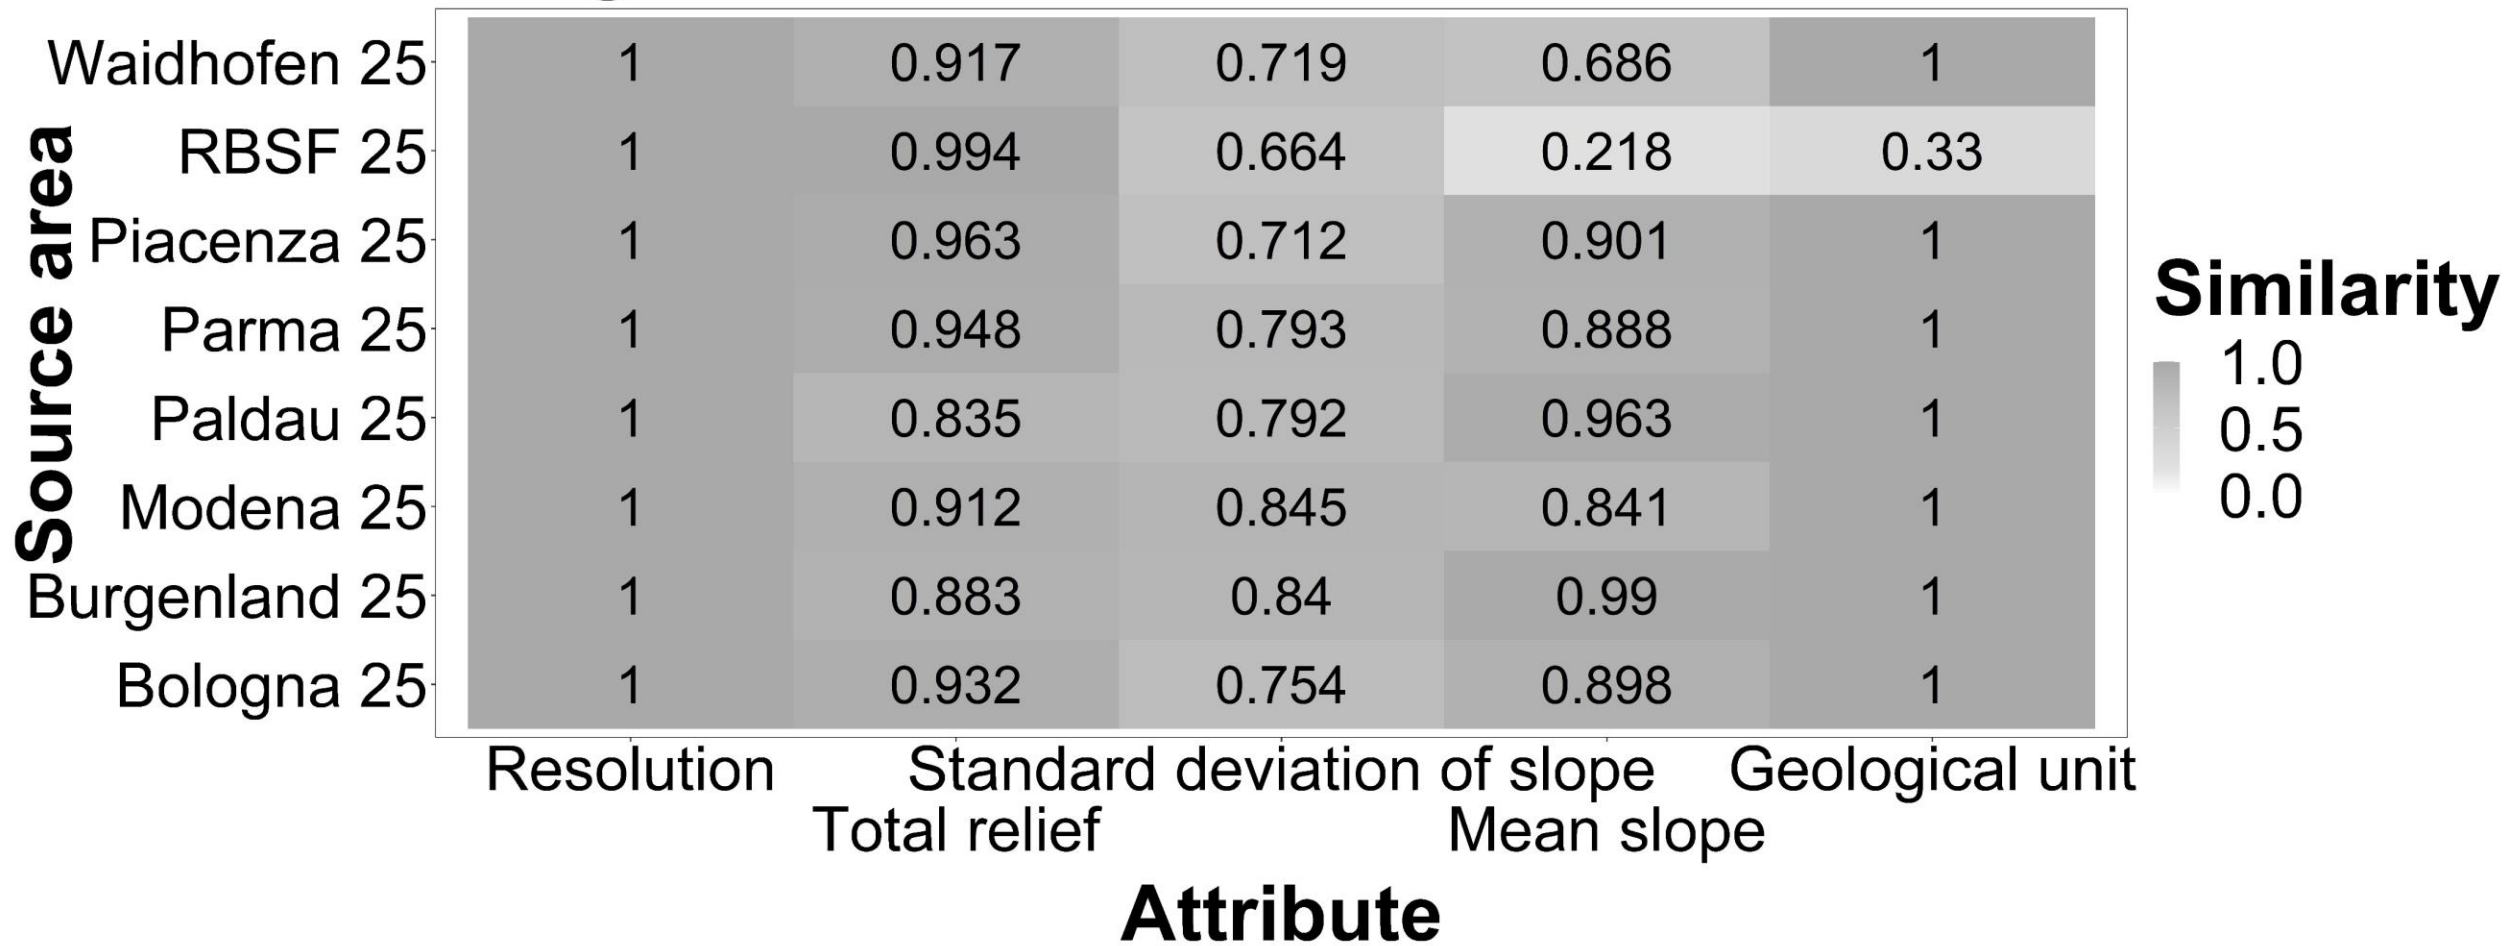

Figure S13: Similarity scores of different attributes for Rimini with a 25 m x 25 m resolution. Light colours represent smaller similarities.



## Target area: Burgenland 25

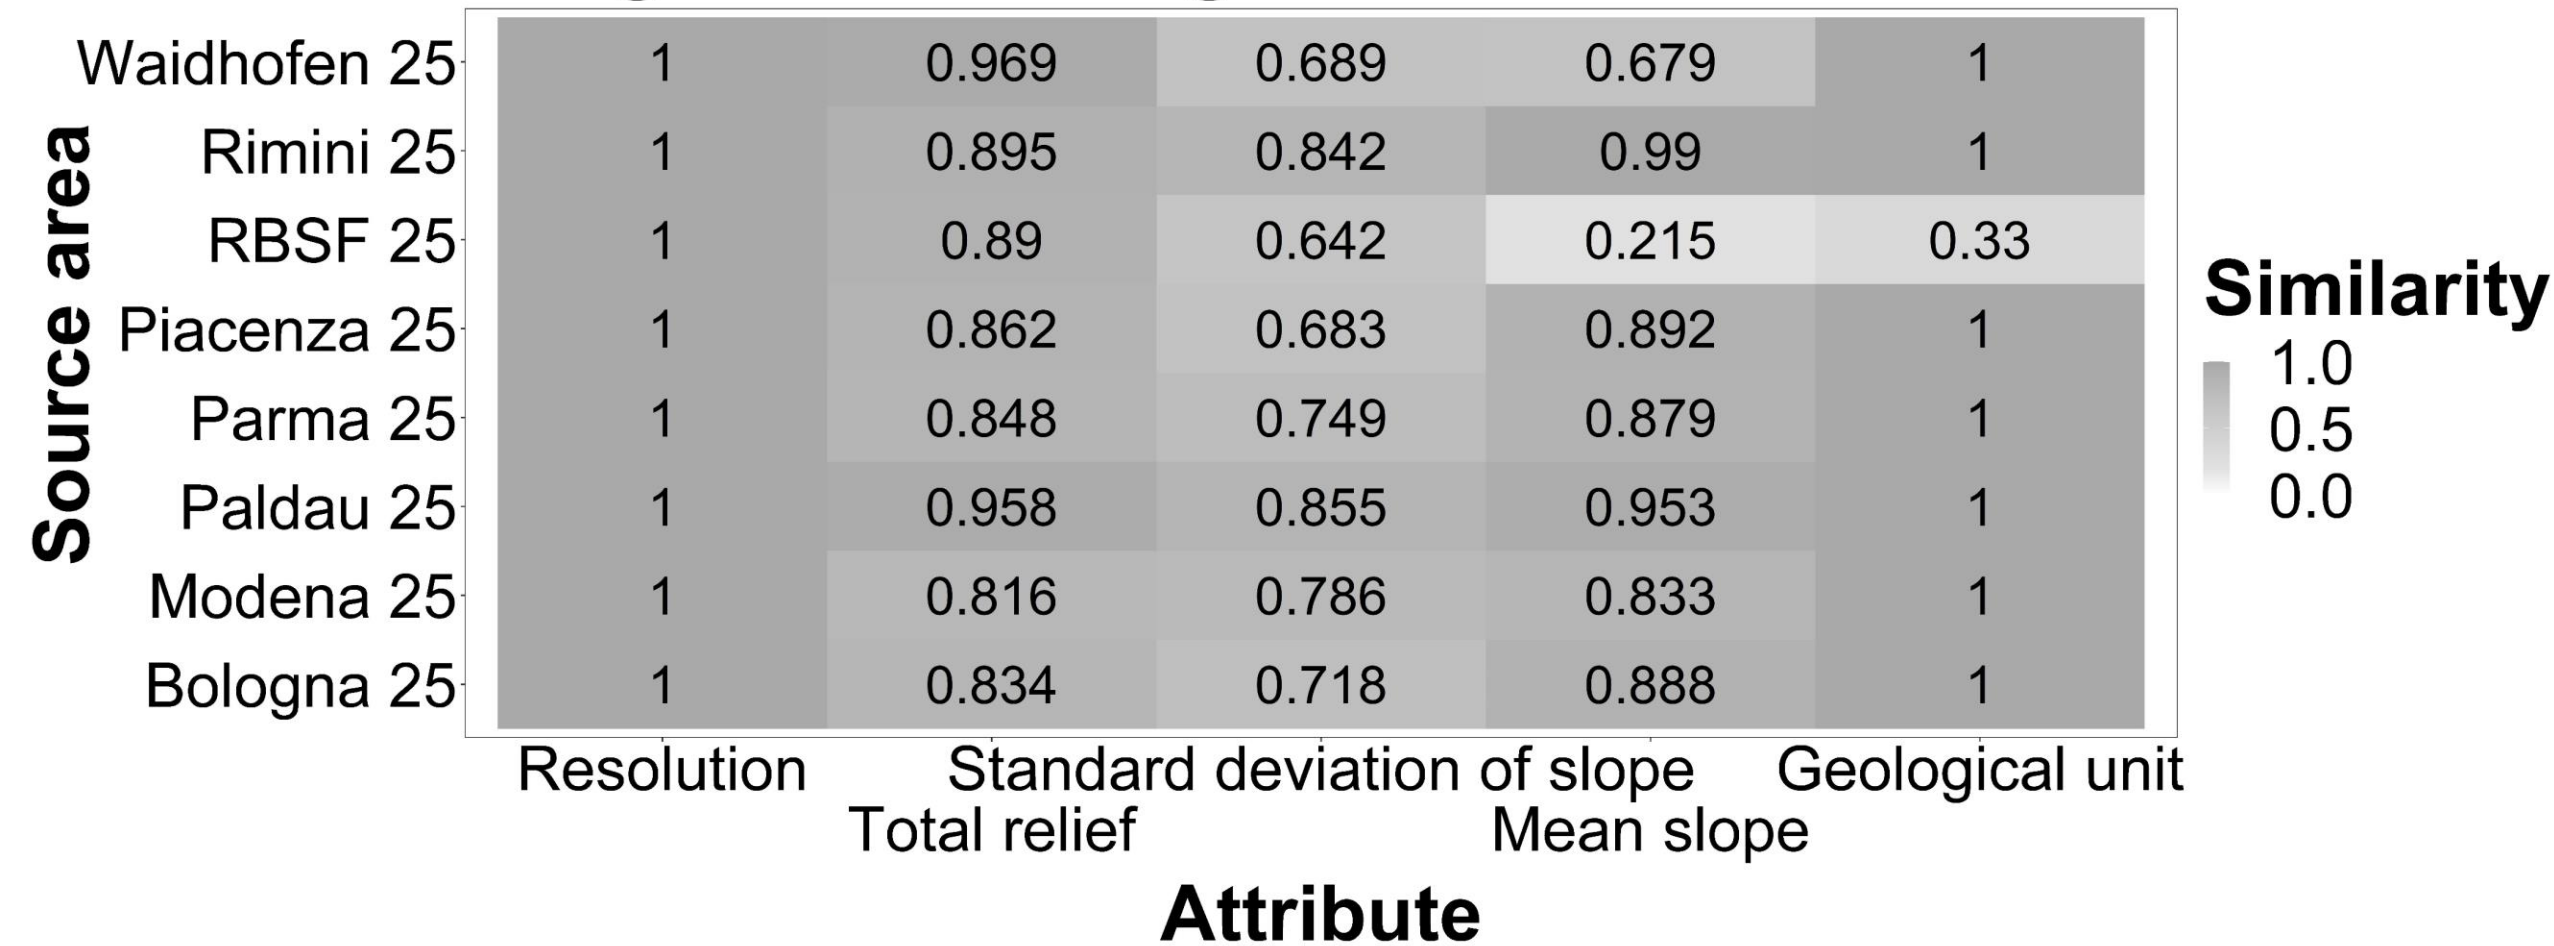

Figure S14: Similarity scores of different attributes for Burgenland with a 25 m x 25 m resolution. Light colours represent smaller similarities.

## Target area: Paldau 25

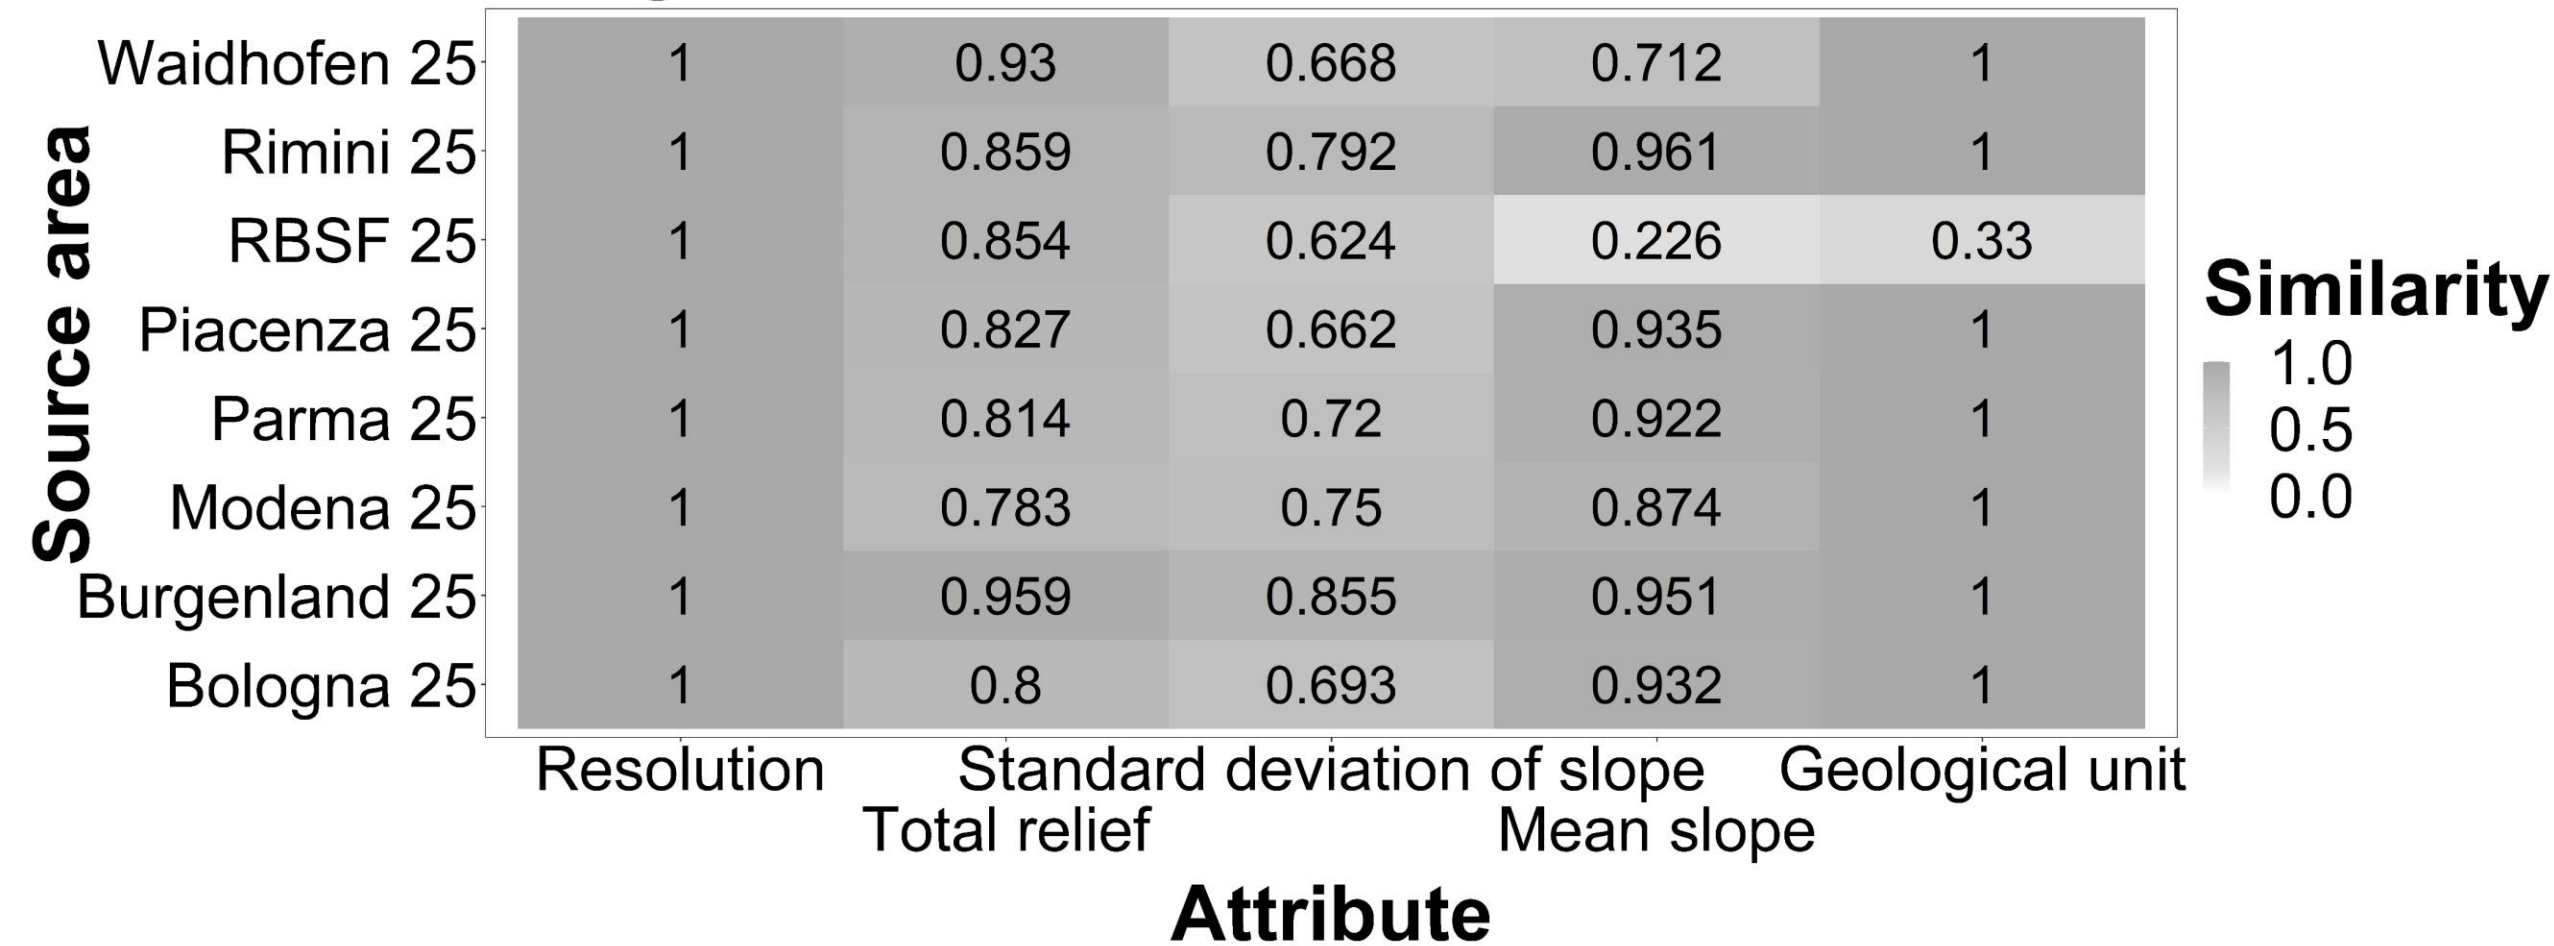

Figure S15: Similarity scores of different attributes for Paldau with a 25 m x 25 m resolution. Light colours represent smaller similarities.

## Target area: Waidhofen 25

Source area

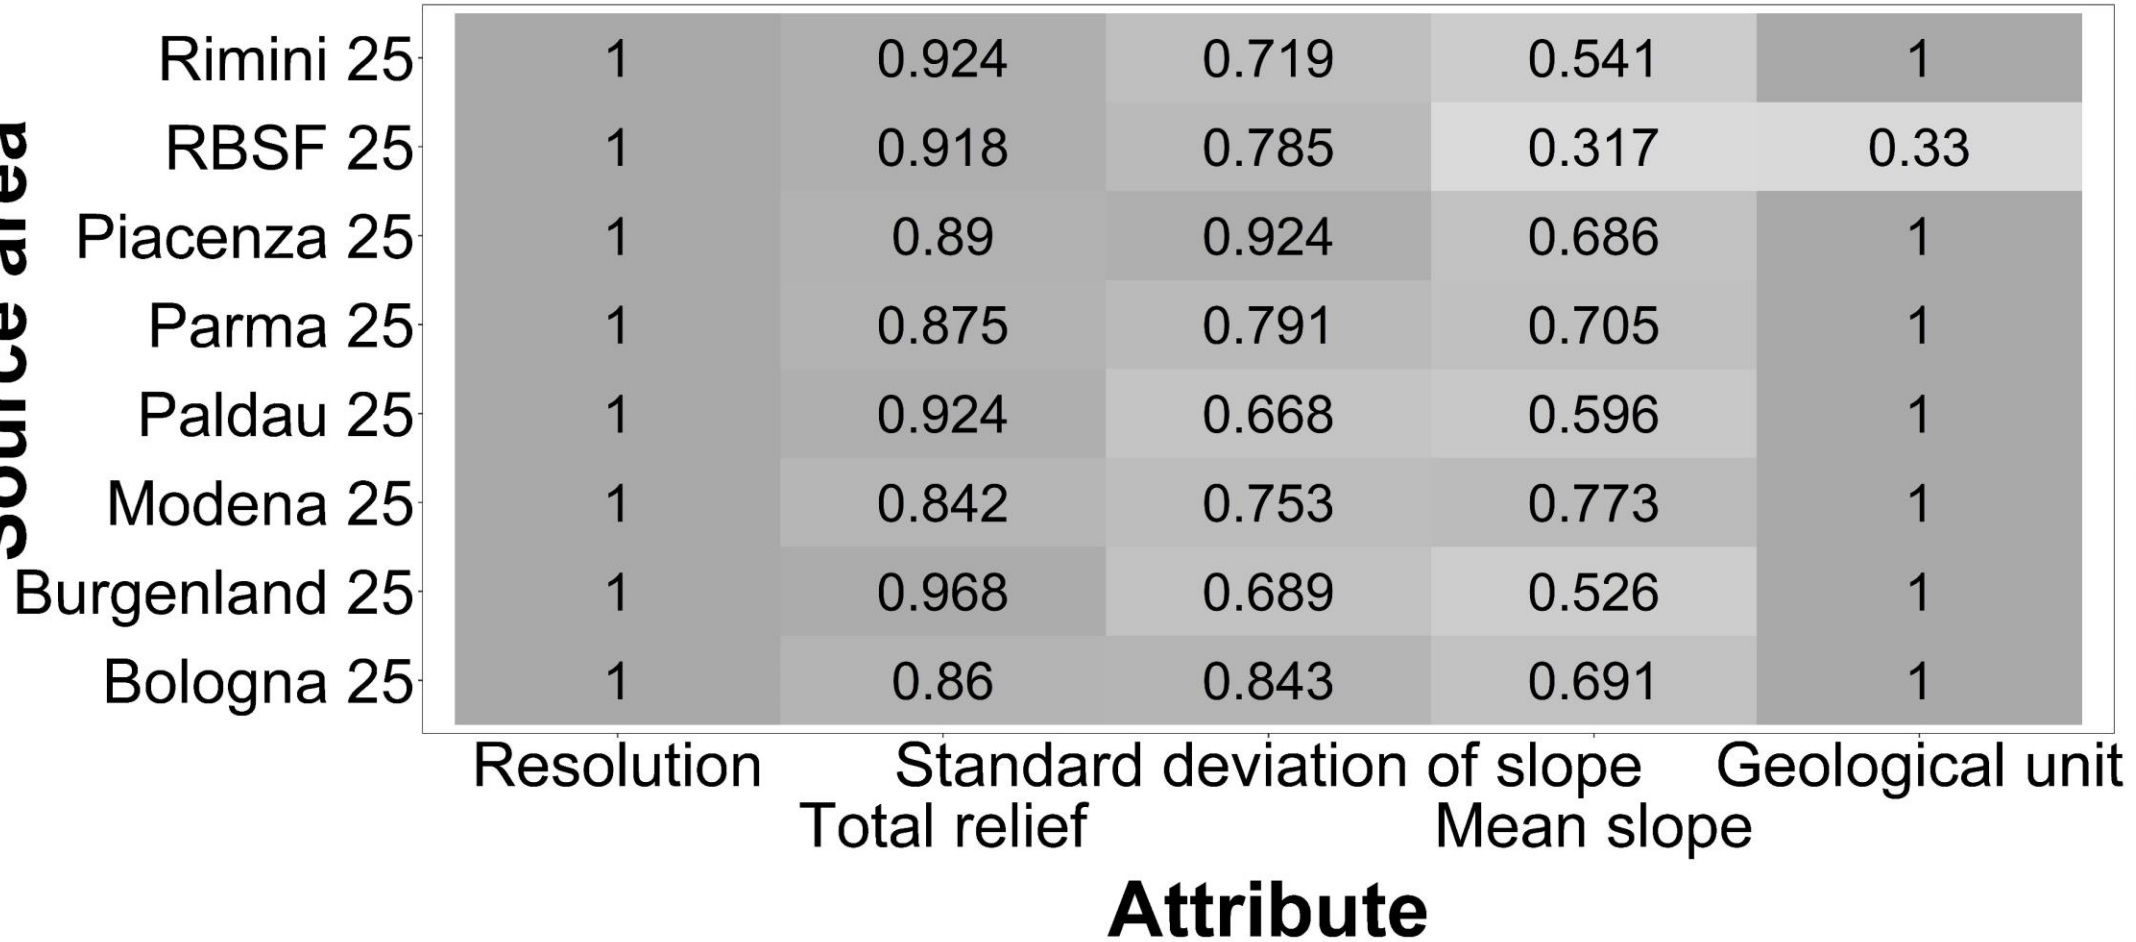

Similarity

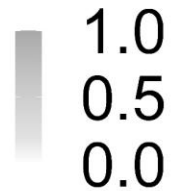

Figure S16: Similarity scores of different attributes for Waidhofen with a 25 m x 25 m resolution. Light colours represent smaller similarities.

## Target area: RBSF 25

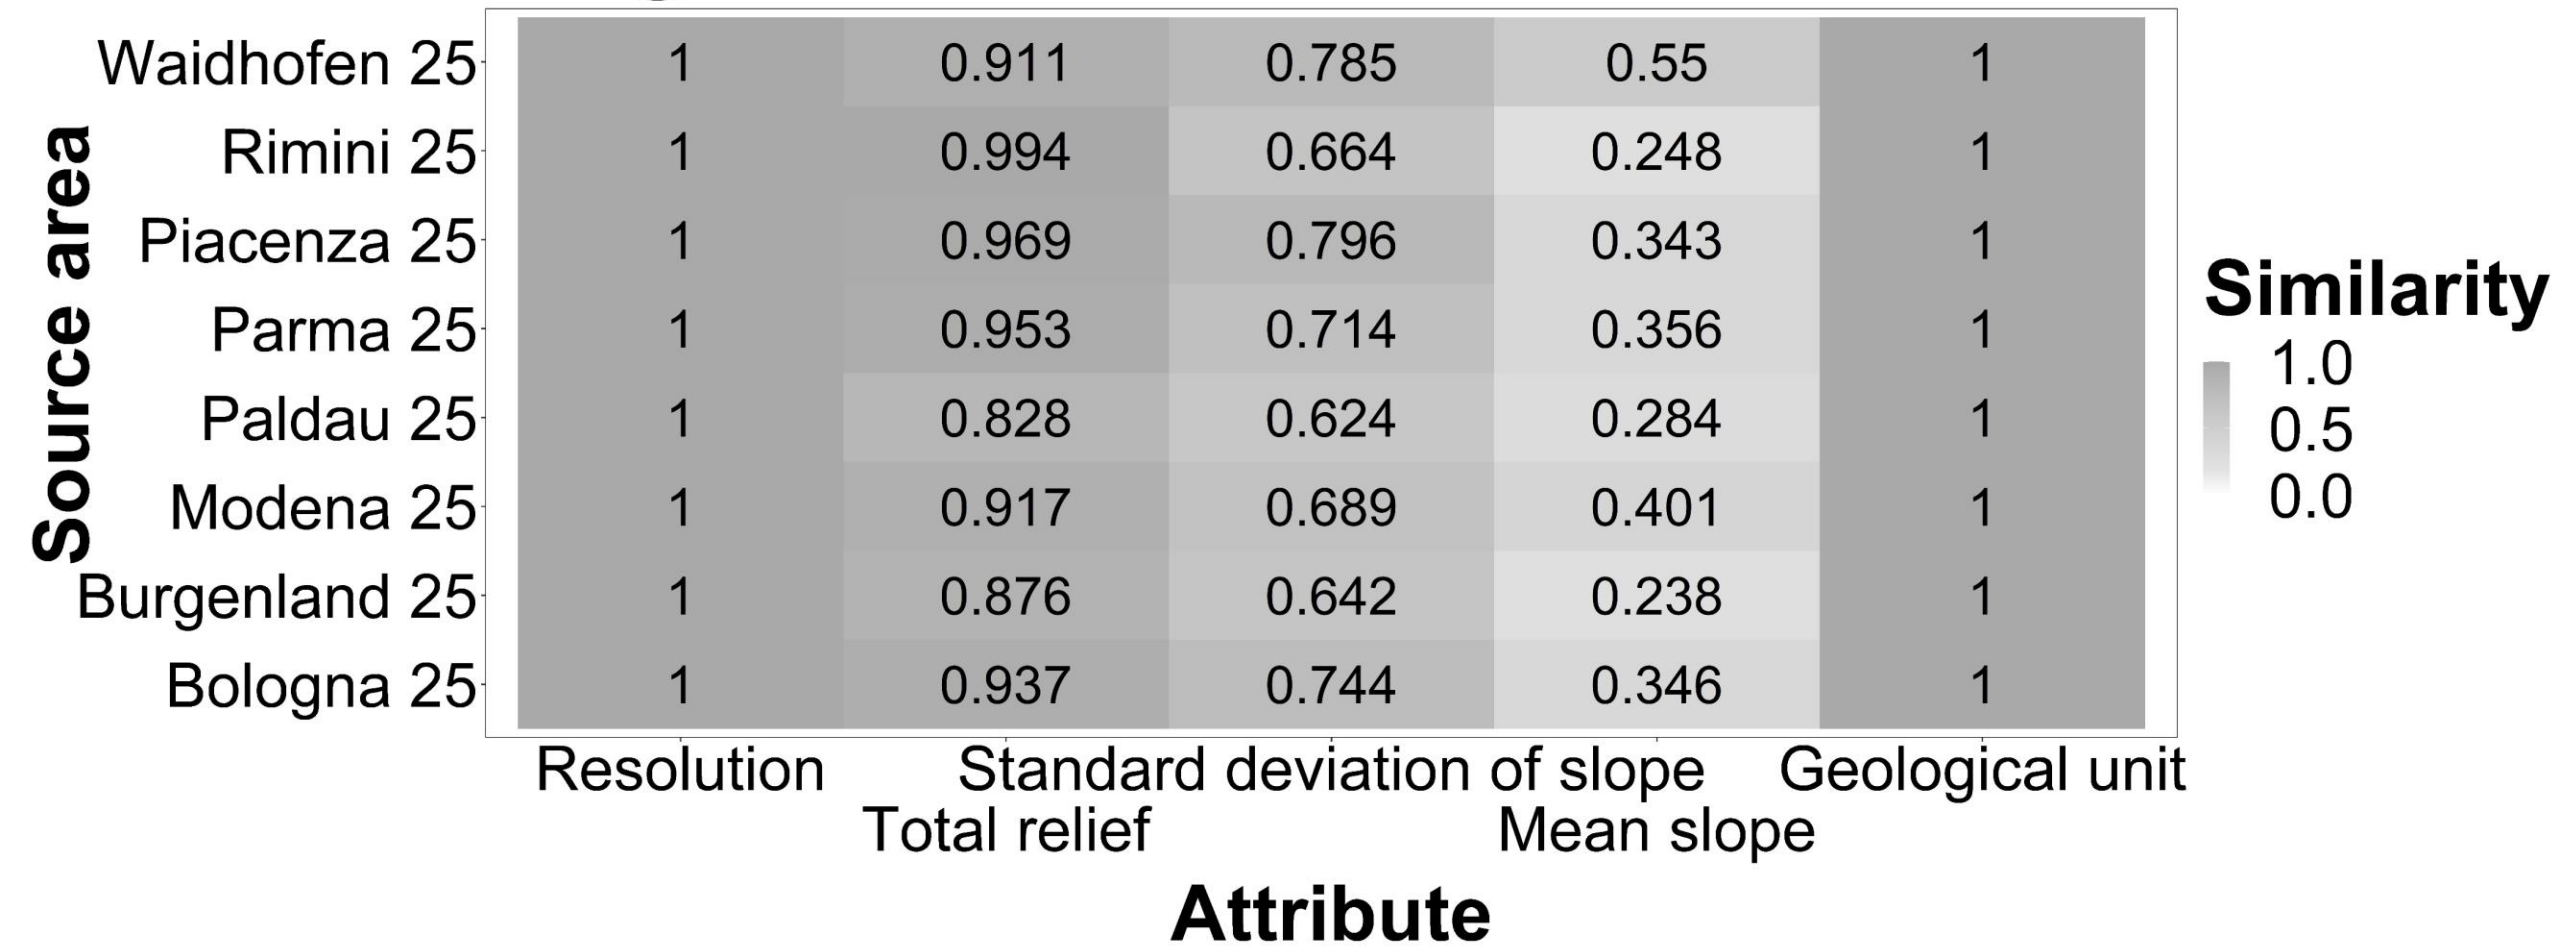

Figure S17: Similarity scores of different attributes for RBSF with a 25 m x 25 m resolution. Light colours represent smaller similarities.
